1 **Cerebellar folding is initiated by mechanical constraints on a fluid-like layer**  
2 **without a cellular pre-pattern**

3 Andrew K Lawton<sup>1</sup>, Tyler Engstrom<sup>2</sup>, Daniel Rohrbach<sup>3</sup>, Masaaki Omura<sup>3,4,5</sup>, Daniel H  
4 Turnbull<sup>4</sup>, Jonathan Mamou<sup>3</sup>, Teng Zhang<sup>6</sup>, J. M. Schwarz<sup>2</sup>, and Alexandra L Joyner<sup>1,7,\*</sup>

5

6 <sup>1</sup> Developmental Biology Program. Sloan Kettering Institute. New York, NY 10065, USA

7 <sup>2</sup> Department of Physics, Syracuse University, Syracuse, NY 13244, USA

8 <sup>3</sup> Lizzi Center for Biomedical Engineering, Riverside Research, NY 10038, USA

9 <sup>4</sup> Skirball Institute of Biomolecular Medicine and Department of Radiology, NYU School of  
10 Medicine, NY 10016, USA

11 <sup>5</sup> Graduate School of Science and Engineering, Chiba University, Chiba 263-8522, Japan

12 <sup>6</sup> Department of Mechanical & Aerospace Engineering, Syracuse University, Syracuse, NY  
13 13244, USA

14 <sup>7</sup> Biochemistry, Cell and Molecular Biology Program, Weill Graduate School of Medical  
15 Sciences of Cornell University, New York, NY, 10065 USA.

16 \* Corresponding author: joynera@mskcc.org, 212-639-3962

17 **Keywords:** cerebellum, development, brain folding, elastic bi-layer, wrinkling, fluid.

18 **Abstract**

19 Models based in differential expansion of elastic material, axonal constraints, directed growth, or  
20 multi-phasic combinations have all been proposed to explain brain folding. However, the cellular  
21 and physical processes at the time of folding have not been defined. We used the murine  
22 cerebellum to challenge the standard folding models with *in vivo* data from the time of folding  
23 initiation. We show that at folding initiation differential expansion is created by the outer layer of  
24 proliferating progenitors expanding faster than the core. However, the stiffness differential,  
25 compressive forces, and emergent thickness variations required by elastic material models are  
26 not present. We find that folding occurs without an obvious cellular pre-pattern, that the outer  
27 layer expansion is uniform and fluid-like, and that the cerebellum is under radial and  
28 circumferential constraints. Lastly, we find that a multi-phase model incorporating differential  
29 expansion of a fluid outer layer and radial and circumferential constraints approximates the *in*  
30 *vivo* shape evolution observed during initiation of cerebellar folding. We discuss how our  
31 findings provide a new mechanistic framework to understand brain folding.

32 Recent work to elucidate the mechanics of in brain folding has primarily focused on the human  
33 cerebral cortex and involved models of directed growth, axonal tension, or differential expansion  
34 of elastic materials that generate compressive forces to drive mechanical instabilities leading to  
35 folding (1-8). Current elastic material models are able to create three-dimensional shapes  
36 strikingly similar to the final folds seen in the adult human cortex (9). A recent multi-phase  
37 model (10) that includes elastic and fluid-like layers, differential expansion and radial constraints  
38 takes into consideration that multiple factors could lead to folding in the developing brain.  
39 However, the cell and tissue level mechanics actually present at the initiation of folding have not  
40 been considered or defined, as technological limitations are significant in animals with a folded  
41 cerebrum.

42

43 The murine cerebellum has a simple alignment of 8-10 stereotypical folds along the anterior-  
44 posterior axis. Combined with the genetic tools available in mouse this allows for precise  
45 developmental interrogation to identify and analyze the *in vivo* cellular and tissue level behaviors  
46 driving growth and folding. The developing cerebellum is distinct from the cerebral cortex, as it  
47 has a temporary external granule cell layer (EGL) of proliferating granule cell precursors that  
48 cover the surface and generate growth primarily in the anterior-posterior (AP) direction (11-13).  
49 During development a thickening occurs in the EGL at the base of each forming fissure, termed  
50 anchoring center (AC) (14), whereas in the adult cerebellum the inner granule cell layer (IGL),  
51 generated by the EGL during the first two weeks of life, is thinnest at the ACs. Previous work on  
52 cerebellar folding utilized a tri-layer elastic model incorporating the EGL, the adjacent molecular  
53 layer, rich in axons and dendrites, and the IGL (7). However, neither the molecular layer nor the  
54 IGL are present when folding is initiated in the embryo. Therefore we argue that a bilayer system

55 consisting of the EGL and underlying core, is a more appropriate approximation for cerebellar  
56 folding.

57

58 Here we show that cerebellar folding emerges from differential expansion between an un-  
59 patterned, rapidly expanding EGL and an underlying core. Additionally, we demonstrate that the  
60 measured stiffness differential, compressive forces, and the thickness variation in the EGL are all  
61 inconsistent with traditional elastic wrinkling models driven by differential growth. Furthermore,  
62 we demonstrate that the expansion of the EGL is uniform, and fluid-like, and that the cerebellum  
63 is under radial and circumferential constraints when folding initiates. Lastly, we constrain the  
64 recent multi-phase model with our *in vivo* data and find we can capture the temporal shape  
65 evolution seen during mouse cerebellum folding initiation. The implications of our findings for  
66 human cerebral cortex folding are discussed.

67

### 68 **Tissue level mechanics drive folding**

69 It is well known that differentially expanding bilayer systems can wrinkle to relax building stress  
70 (15-19). We reasoned that in the cerebellum the EGL could behave as a quickly expanding outer  
71 layer and its attachment to a more slowly growing core could generate forces that result in a  
72 wrinkling-like phenotype. To test whether the cerebellum has differential expansion between the  
73 two layers, we measured the expansion of the EGL and the core during the time of initiation of  
74 folding from midline sagittal sections (Fig 1a-d). Unlike the cerebral cortex, the unfolded murine  
75 cerebellum is a simple cylinder-like structure elongated in the medio-lateral axis (Fig. 1e) (20).  
76 All folds in the medial cerebellum (vermis) are aligned in the same axis allowing 2-D  
77 measurements to estimate expansion in the anterior-posterior axis of the vermis. Therefore the



78 length of the surface of the EGL was used as a measure of the cerebellum surface area and the  
79 area of the core as an approximation of cerebellum volume (Fig. 1d), and measurements were  
80 made each day from embryonic day 16.5 (E16.5) through postnatal day 0 (P0). In cross-section  
81 the unfolded cerebellum approximates a semicircle, therefore we reasoned that if the cerebellum  
82 were to remain unfolded then the ratio of expansion between the length of the EGL and the area  
83 of the core should approximate the ratio of the circumference of a semi-circle to its area. Of  
84 significance, we found that at E16.5 and E17.5 the ratios of growth between the EGL and core  
85 closely approximated the expansion of a semi-circle. However, at E18.5 and P0 the expansion  
86 rate of the EGL was greater than the rate of core expansion (Fig. 1f). Thus we uncovered that the  
87 cerebellum does indeed go through a phase of differential expansion. We next determined  
88 whether differential expansion correlates with when folding occurs by calculating a folding index  
89 (the convex curvature of the EGL divided by the length of the EGL) at each stage (21). Indeed,  
90 we found that the cerebellum remains unfolded during the initial proportional expansion between  
91 the EGL and core and only folds when the differential expansion is initiated (Fig. 1g). These  
92 results provide quantitative evidence that cerebellar folding involves tissue level mechanical  
93 forces arising from differential expansion.

94

#### 95 ***In vivo* data contradict elastic bilayer models**

96 Since there is differential expansion between the EGL and the core and as this type of expansion  
97 is the driver of elastic bilayer models we tested whether the properties of cerebellar tissue are  
98 consistent with the requirements and predictions of such models. Briefly, the initial resulting  
99 wrinkling instability defines the distance between folds as the initial sinusoidal undulations  
100 increase in amplitude to ultimately turn into lobules. The folding wavelength depends on the

101 thickness of the external layer (EGL) and the ratio of the stiffness of the two layers (EGL/core).

102 In particular, for a planar geometry, with the stiffness of the external layer defined as  $E_o$ , the

103 stiffness of the core as  $E_i$ , and the thickness of the external layer denoted as  $t$ , the folding

104 wavelength  $\lambda$  is given by (22)

$$105 \quad \lambda = 2 \pi t \left( \frac{1 E_o}{3 E_i} \right)^{1/3} .$$

106 If the length of the system is  $l$ , then the number of folds is inversely proportional to the thickness

107 of the EGL

$$108 \quad n = \frac{l}{\lambda} \propto \frac{l}{t} \left( \frac{E_i}{E_o} \right)^{1/3} .$$

109 We explored a standard elastic bilayer model in a circular geometry using the observed ratio of

110 thickness of the EGL to radius of the cerebellum near the onset of shape change (E16.5) and

111 invoked a neo-Hookean elastic solid for both layers (23). The resulting shape change was studied

112 as a function of the ratio of the layer stiffness values (Fig. 2a). We found that to produce the

113 observed number of folds (three in the semi-circular cerebellum and 6 in the circular model) at

114 initiation of folding through wrinkling based models constrained by our measurements of the

115 embryonic cerebellum, a large stiffness ratio was required of around 50. To map the stiffness

116 contrast in the cerebellum we used scanning acoustic microscopy to measure the bulk modulus of

117 the cerebellum daily from E16.5 to P18.5 (Fig. 2b-c, Supplemental Fig. 1). For small

118 deformations, we expect the instantaneous bulk modulus to be linearly related to the stiffness

119 and, therefore, the ratio of the instantaneous bulk moduli should scale similarly to the ratio of

120 stiffnesses (assuming the same Poisson's ratio for the EGL and for the core, neither of which

121 have been directly measured). While this qualitative approach may not be able produce the

122 absolute values of the elastic properties of the tissues, it can give a reasonable indication of the

123 stiffness of different parts in the cerebellum. Using this estimation, we found that the EGL has a  
124 slightly higher instantaneous bulk modulus than the core at all stages measured. Unsurprisingly,  
125 the ratio ( $\sim 1:1.05$ ) was not close to being sufficient to produce a folding wavelength similar to  
126 that in the cerebellum (Fig. 2d). Consistent with our finding, small modulus contrasts have been  
127 reported for other brain regions with multiple loading modes, such as shear, compression, and  
128 tension (4,7,24). Elastic material models with graded growth profiles have been developed that  
129 predict folding of cerebral cortex without a large stiffness differential (1). However, these  
130 models are still bound by other measurable requirements as discussed below.

131 Elastic bi-layer wrinkling models predict compressive forces in the outer layer. Simulations  
132 performed of cuts through the outer layer and into the inner layer predict that upon relaxation the  
133 outer layer should not open (Fig. 2e). We tested whether this prediction reflects the biology using  
134 surgical dissection blades to make radial cuts across the meninges, EGL, and into the core of live  
135 E16.5 tissue slices. Time-lapse imaging revealed that, in contrast to the prediction, the EGL  
136 opens as well as part of the underlying cut in the core (Fig. 2f-h, Supplemental Fig. 2a-c, and  
137 Supplemental Movie 1). This result indicates there is circumferential tension within the outer  
138 layers of the cerebellum. This finding also rules out the elastic models with graded growth  
139 profiles as they predict compressive forces in outer region as well.

140

141 The elastic bi-layer model requires the EGL to be thinnest at the base of each AC, which are the  
142 lowest parts of the cerebellar surface. Thus, the EGL should have an “in-phase” thickness  
143 variation. Without this feature, a purely elastic model – bi-layer based or even graded growth  
144 profile based – cannot be in mechanical equilibrium (in the quasistatic limit). However, we  
145 previously reported that the embryonic EGL is thickest in the ACs when folding initiates, i.e., it

146 has an “out-of-phase” thickness variation (14). To validate this observation, we quantified the  
147 thickness variations in the EGL centered at the ACs present at E16.5-18.5. Not all cerebella have  
148 visible AC at E16.5. However in the subset that do and in the three ACs present at E17.5, the  
149 EGL was found to be 1.2 – 1.4 times thicker in the ACs than in the surrounding EGL (Fig. 2i-l  
150 and Supplemental Fig. 3). Moreover, the thickness ratio increased to 1.7 times at E18.5 (Fig 2l).  
151 As described above, the final thickness variations of the IGL (as well as the molecular layer) of  
152 the cerebellar cortex are in-phase, just as the layers of the adult cerebral cortex. These results  
153 further show that traditional elastic wrinkling models cannot capture the initiation of cerebellum  
154 folding, and highlight the importance of making biological measurements at the time of folding  
155 rather than when it is complete.

156

### 157 **Uniform outer layer expansion without a cellular pre-pattern**

158 As elastic bi-layer models do not align with the biology of cerebellar folding, we looked for  
159 other drivers of morphometric changes. Since the EGL drives the majority of cerebellar growth  
160 (11-13), we first tested whether regional differences in EGL proliferation rates are present that  
161 could influence the folding pattern of the cerebellum. Proliferation rates (S phase index) were  
162 measured in the EGL during folding initiation (E16.5 and E17.5) in the inbred FVB/N strain to  
163 reduce variation between samples. First we asked if the regions that will give rise to distinct sets  
164 of lobules have different rates of proliferation that could contribute to the larger and smaller sizes  
165 that the lobules ultimately attain. We focused on the anterior cerebellum that divides into a larger  
166 region with lobules 1-3 (L123) and smaller region (L45), as well as the central area that  
167 comprises lobules 6-8 (L678) of the cerebellum (Figure 3a-b). The more posterior cerebellum  
168 does not consistently fold at this stage, thus measurements were not included. Interestingly, we

169 found that the proliferation rates were similar in the three regions at E16.5 (Fig. 3c). The EGL  
170 proliferation rate at E17.5 in L678 was slightly reduced compared to the L123 region, but no  
171 other differences were found (Fig. 3d). Thus proliferation is uniform just before initiation of  
172 folding and the small difference found during folding does not correlate with lobule size. This  
173 result indicates that lobule size is not determined by modulating the levels of proliferation at the  
174 onset of folding. Rather, lobule size could be set by both the timing of invagination, and the  
175 distance between ACs as granule cell precursors in one lobule do not cross the surrounding ACs  
176 to contribute to an adjacent lobule (12).

177  
178 Each AC is first detected as a regional inward thickening of the EGL (14) (Fig 2i-l and  
179 Supplemental Fig.3). We measured the proliferation of the EGL specifically within the forming  
180 AC regions to test whether altered proliferation rates could explain the thickenings and therefore  
181 the initiation of an AC. We found the rate of proliferation within each forming AC region at  
182 E16.5 and E17.5 was the same as in the surrounding EGL (Fig. 3e,f), thus proliferation within all  
183 regions of the EGL at the initiation of folding is uniform. Furthermore, regional modulation of  
184 proliferation does not form or position the ACs.

185  
186 At E18.5, after the initiation of folding, we found that the rate of proliferation was significantly  
187 lower in the L678 region compared with the L123 and L45 regions (Supplemental Fig. 4a).  
188 However, proliferation within the ACs at E18.5 remained uniform with the surrounding regions  
189 (Supplemental Fig .4b). Since ACs compartmentalize the EGL, our results show that regional  
190 differences in proliferation rates arise in lobule regions after initiation of folding, which thus  
191 could be important for determining the ultimate size of the folds.

192

193 Changes in cell size and shape have been shown to induce morphological changes (25-28). To  
194 test if regionally specific regulation of cell shape or size directs folding, we fluorescently labeled  
195 cell membranes of scattered granule cell precursors (GCPs) in the EGL using genetics (*Atoh1-*  
196 *CreER/+; R26<sup>MTMG/+</sup>* mice injected with tamoxifen two days prior to analysis). We then  
197 segmented the cells in 3D and quantified their sphericity (Fig. 3g). We discovered that GCPs in  
198 the EGL take on a large variation of shapes and sizes at E16.5 and E18.5. However, we found no  
199 difference in cell shape in the different lobule regions of the EGL or between the AC areas and  
200 the surrounding EGL at each age (Fig. 3h,i). Cell size was uniform at both stages except for a  
201 slight reduction in L678 at E16.5 when compared with L123 and the AC regions. However, the  
202 size of cells is reduced at E18.5 compared to E16.5 (Fig 3 j,k and Supplemental Fig 4c). Thus,  
203 the proliferating GCPs that drive expansion of the EGL have both uniform proliferation rates and  
204 similar shapes and sizes across the lobule regions defined by the first three ACs at folding  
205 initiation.

206

### 207 **Uniform fiber distribution and radial tension at folding initiation**

208 The EGL is traversed by fibers of Bergmann glial and radial glial cells (29-31). We tested  
209 whether the fibers are distributed in patterns that could locally change the physical properties of  
210 the EGL and induce invaginations. Genetics was used to fluorescently label cell membranes of  
211 scattered glial cells (*nestin-creER/+;R26<sup>MTMG/+</sup>* mice injected with tamoxifen at E14.5) (Fig 4a).  
212 Fibers crossing the EGL at E16.5 were counted in sagittal slices and aligned relative to the ACs  
213 (Fig. 4b). This analysis showed that the Bergmann glial and radial glial fibers are distributed

214 evenly along the AP axis of the EGL, and therefore are not directing the positions where folding  
215 initiates based on an uneven regional distribution.

216

217 Tension based folding models suggest constraints from axons and other fibers could direct  
218 folding (4, 32). Since the cerebellum is under circumferential tension, as demonstrated above, we  
219 examined evidence of radial tension between the EGL and the ventricular zone (VZ) at the  
220 initiation of folding. Cuts were made in live E16.5 tissue slices between the EGL and VZ  
221 running approximately parallel to them so that they cut across radial fibers in the anterior  
222 cerebellum (Fig 4c). As predicted, after cutting the tissue relaxed revealing tension directed  
223 radially within the cerebellum (Fig. 4d,e and Supplemental Fig 2 and Supplemental Movie 2).  
224 Interestingly, quantification of how the radial and horizontal cuts open revealed that only the  
225 horizontal cuts opened along the full length of the cut although they opened more slowly than  
226 radial cuts (Supplemental Fig 2g-j), indicating different stress profiles in the two orientations.

227

228 Taken together, at the time of folding initiation the EGL, which is driving the differential  
229 expansion, is itself growing uniformly and the cerebellum is under both radial and  
230 circumferential constraints. Finally, there is no evidence of any pre-patterning in the EGL in  
231 either cellular behaviors or fiber distribution.

232

### 233 **The EGL is fluid-like as cells undergo dynamic rearrangement**

234 As the granule cells within the EGL have such varied shapes as shown above, we looked to see if  
235 the cells within the EGL were undergoing any rearrangement movements that may indicate fluid  
236 properties. A small, scattered fraction of nuclei in the EGL were fluorescently labeled (*Atoh1*-

237 *CreER/+; R26<sup>Ai75/+</sup>* injected with tamoxifen two days prior to imaging) and *ex vivo* slice-culture  
238 time-lapse imaging was performed for up to five hours. Tracking the cell positions through time  
239 revealed that granule cells within the EGL are highly motile within the EGL. Furthermore, there  
240 was no obvious directionality or collectivity to the movement. However, the dynamic motility  
241 resulted in the constant exchanging of nearest neighbors over the course of tens to hundreds of  
242 minutes and shows that at the timescale of folding the EGL is more fluid-like than a solid  
243 epithelial layer (Figure 5 and Supplemental Movies 3 and 4).

244

#### 245 **Multi-phase wrinkling model simulates cerebellar shape change during folding initiation**

246 We recently developed a model for folding from differentially expanding bi-layer tissues that  
247 takes into account the out-of-phase thickness of the outer layer of several systems and possible  
248 contribution of radial mechanical constraints present in neurological tissue (10). We applied the  
249 model here to the initiation of cerebellar folding based on five primary assumptions. First, the  
250 core is an incompressible material ( $\mu$ ) as indicated by the bulk modulus measurements. Second  
251 the outer layer, i.e. the EGL, expands uniformly ( $k_t$ ) as shown by the proliferation rate. Third, the  
252 EGL is assumed to be a fluid-like material as demonstrated by the live-imaging of neighbor  
253 exchanges. Fourth, there is an elastic component radially to the entire cerebellum ( $k_r$ ), seen in the  
254 cutting and relaxation experiment and possibly mediated by radial glia. Fifth, the EGL is  
255 constrained towards a uniform thickness ( $\beta$ ), possibly by Bergmann glia fibers spanning the  
256 EGL. Given the interplay between incompressible material, compressible fibrous material, and a  
257 proliferating non-elastic EGL, this model is multi-phase.

258



259 An energy functional parameterized by both the inner and outer boundary of the EGL and  
260 incorporating the above five assumptions into three dimensionless parameters ( $\mu/k_r$ ,  $k_r/k_t$ ,  $k_t/\beta$ ) is  
261 minimized to yield an equation for a driven harmonic oscillator resulting in sinusoidal shapes for  
262 both the inner and outer boundary of the EGL given an initial elliptical shape. In contrast with  
263 the elastic bilayer wrinkling model, EGL thickness oscillations are found to be out-of-phase with  
264 the surface height (radius) oscillations when  $0 < \mu/k_r < 1$ . Additionally, the model predicts that  
265 the ratio of the measured surface height amplitude ( $A_r$ ) and the EGL thickness amplitude ( $A_t$ ) is  
266 given by

267 
$$\frac{A_r}{A_t} = \frac{\frac{\mu}{k_r}}{1 - \frac{\mu}{k_r}},$$

268 which need not be  $\gg 1$  as is typical of elastic bilayer wrinkling, and the number of initial folds  
269 at E16.5 is determined by

270 
$$n = \sqrt{\frac{k_t}{\beta}} \sqrt{1 + \frac{\frac{\mu}{k_t}}{1 - \frac{\mu}{k_r}}}.$$

271 Note that in contrast with elastic wrinkling, the number of initial folds does not depend on the  
272 thickness (a length scale) of the EGL, but only on material properties.

273

274 Given that our tissue cutting and relaxation experiment revealed circumferential tension in the  
275 cerebellum at folding initiation (Fig. 2f-h, Supplemental Movie 1), we returned to the  
276 mathematics and found a previously unrealized geometric relationship in the circular limit of the  
277 model that in fact assumes circumferential tension in addition to the previously discussed radial  
278 tension given that the perimeter of a circle is determined by its radius.

279

280 To rigorously test the shape prediction of the model, we first constrained 3 of the 5 parameters  
281 for a circular version of the model by using both the thickness amplitude, and average thickness  
282 of the EGL, as measured at E16.5, and the number of initial folds. Secondly, the parameter  $\mu/k_r$   
283 (denoted as  $\epsilon$ ) was assumed to scale linearly with time. Together, this allowed for the generation  
284 of shape predictions at later developmental stages (E17.5 and E18.5) from the E16.5 starting  
285 approximation. Solving the numerical model as constrained by our measured embryonic data we  
286 found that it closely approximates the phase and amplitude behavior of EGL thickness and radius  
287 oscillations from E16.5 through E18.5. (Fig. 6a-c). However, the model is not able to produce  
288 self-contacting folds or hierarchical folding, both of which are seen in the cerebellum at later  
289 stages.

290

### 291 **Hierarchical folding involves differential growth**

292 The cerebellum has hierarchical folding in which the initial folds become subdivided. Given that  
293 ACs hold their position during development and compartmentalize granule cells within lobules  
294 of the EGL (12) we reasoned that the ACs could be acting as mechanical boundaries enabling  
295 similar mechanics to drive the secondary folding. To test this possibility we measured the  
296 expansion of the EGL and the core of the individual lobule regions from E18.5 to P3. We found  
297 that indeed in the lobule regions that undergo folding there is a temporal correlation between  
298 when the onset of sub-folding and differential expansion occur (Supplemental Fig. 5a-d). In  
299 contrast, the region (L45) that does not fold during the same time period has a different, more  
300 rectangular shape, and the ratio of EGL growth to core growth is proportional for a rectangle  
301 during the time measured (Supplemental Fig. 5).

302

## 303 **Discussion**

304 Here we have provided experimental evidence that cerebellar folding emerges without obvious  
305 pre-patterning. Additionally, the outer layer has fluid-like properties and expands uniformly, and  
306 the growth creates a differential expansion between the outer layer and the core. Thus, traditional  
307 morphometric cellular behaviors such as changes in cell shape, size and proliferation do not  
308 direct where cerebellar folding initiates. Furthermore, our developmental interrogation revealed  
309 tissue moduli, mechanical constraints, and emergent thickness variations in the EGL that are  
310 fundamentally inconsistent with traditional elastic bilayer wrinkling models. Therefore our  
311 results call for a new understanding of brain folding.

312

313 By applying a multi-phase model constrained by our measured data we were able to capture the  
314 correct shape variations and number of folds at the onset of folding. Our new framework  
315 accounts for: the rapidly expanding fluid EGL, whose thickness is proposed to be regulated by  
316 Bergmann glial fibers, the slower growing incompressible core, and fibrous material in the form  
317 of glial fibers and possibly axons as well as the meninges that potentially provide radial and  
318 circumferential tension (Supplemental Fig. 6). This multi-phase model of folding makes many  
319 new predictions. One such prediction is that adjusting the amount of tension spanning the  
320 cerebellum will change the degree of folding. Indeed, alterations of the cells that likely create  
321 tension-based forces could explain the dramatically disrupted folding seen in mouse mutants in  
322 which radial glia do not produce Bergmann glia (33). Without Bergmann glia, the EGL would be  
323 expected to not form a layer with regular thickness and it should be more sensitive to variations  
324 in radial glial tension. Consistent with this prediction, mutants without Bergmann glia have more

325 localized and less regular folds (34). Our combination of experimental studies and modeling thus  
326 provide new insights into cerebellar folding, including an underappreciated role for tension.

327

328 Under the new framework revealed by our measurements made in the developing mouse  
329 cerebellum, to approximate the observed shape changes in the murine cerebellum from E17.5 to  
330 E18.5 the ratio of the core stiffness over the radial tension must increase. Yet, the measured bulk  
331 modulus of the core shows no increase during development. Therefore a second prediction is that  
332 radial tension must decrease during development. While the cerebellum is crossed by many  
333 fibers at folding initiation, radial glial fibers are an attractive candidate to mediate this change in  
334 radial tension (34, 35). First, they span from the VZ to the surface of the cerebellum at E16.5.  
335 Additionally, during folding initiation the radial glia undergo a transition into Bergmann glia  
336 where they release their basal connection to the VZ and the cell body migrates towards the  
337 surface (21). This transition could lead to a reduction in the global radial tension and thus would  
338 be consistent with our model prediction.

339

340 The mechanics underlying hierarchical folding remain an open challenge. However, our  
341 developmental data may provide a way forward. As ACs maintain their spatial positions, and as  
342 they compartmentalize granule cells within the EGL into the lobule regions (12), we propose that  
343 they create fixed mechanical boundaries that divide the cerebellum into self-similar domains.  
344 These domains, with their similar physical properties to the initial unfolded cerebellum, can then  
345 undergo additional folding. Furthermore since ACs compartmentalize granule cells within the  
346 lobule regions, once separated the lobule regions can develop distinct characteristics, like the  
347 observed differential proliferation rates at E18.5. We speculate, therefore, that the folding

348 patterns seen across cerebella in different species evolved by adjustment of global as well as  
349 regional levels of differential expansion and tension which ultimately mold the functionality of  
350 the cerebellum.

351

352 Finally it is interesting to note the similarities and differences between the developing  
353 cerebellum and the cerebral cortex. Radial glia span the entire cerebral cortex just as in the  
354 cerebellum (36). Furthermore, species with folded cerebrums have evolved outer radial glial cells  
355 for which the cell body leaves the ventricular zone and to become positioned near the surface  
356 while retaining fibers anchored on the surface, similar to Bergmann glia in the cerebellum (29,  
357 37). While we have emphasized the notion of tension via glial fibers in the developing  
358 cerebellum, axonal tension has been discussed in the context of shaping the developing cerebrum  
359 (32). Tissue cutting in the cerebral cortex of ferrets has revealed a similar tension pattern during  
360 folding as we found in the cerebellum (4). We therefore submit that our work calls for a revival  
361 of the notion of how tension affects the shape of the developing cerebrum.

362

363 Unlike the cerebellum, the cerebral cortex is not divided into a simple bilayer system. However,  
364 outer radial glial cells proliferate, much like the GCPs of the EGL, to drive the expansion of the  
365 outer regions of the cerebral cortex around the time of initiation of folding (38-40). Moving the  
366 zone of proliferation out from the VZ gives more space for the increased proliferation required in  
367 folding systems. The cerebellum, housing 80% of the neurons in the human may be an extreme  
368 example requiring the region of proliferation to be completely on the outer surface (41).  
369 Constraining models of folding of different brain regions with developmental data will bring  
370 about a more accurate quantitative understanding of the shaping of the developing brain.

371

## 372 **Materials and Methods**

373 All experiments were performed following protocols approved by Memorial Sloan Kettering  
374 Cancer Center's Institutional Animal Care and Use Committee. All materials and methods used  
375 to support this study are described in SI Materials and Methods.

376

377 **Acknowledgements** We are grateful to Anna-Katerina Hadjantonakis and Songhai Shi for use of  
378 Imaris software. We thank Jennifer Zallen and Anna-Katerina Hadjantonakis for experimental  
379 advice, Nathanael Kim for help with the acoustic microscopy and Professor Tadashi Yamagushi  
380 for his support for MO's visit to New York. We appreciate the discussions we have had with  
381 Alexandre Wojcinski and the entire Joyner Laboratory, and the administrative support from Cara  
382 Monaco. This work was supported by grants from the NIH to A.L.J. (R37MH085726 and  
383 R01NS092096) and A.K.L. (F32 NS086163) and a National Cancer Institute Cancer Center  
384 Support Grant (P30 CA008748-48). T.A.E. and J.M.S. acknowledge financial support from NSF-  
385 DMR-CMMT Award Number 1507938 and NSF-PHY-PoLS Award Number 1607416. FE  
386 simulations were performed at the Comet cluster (Award no. TG-MSS170004) in XSEDE. The  
387 development of the acoustic microscopy instrument and signal-processing methods was  
388 supported by NIH grant R21EB016117 awarded to J.M.

389

## 390 **Author Contributions**

391 A.K.L. and A.L.J. conceived the project; T.E., T.Z. and J.M.S. designed and performed the  
392 modeling, A.K.L. and A.L.J. designed the experimental research; A.K.L. performed the  
393 experiments; D.R., M.O., J.M. and D.T. performed the acoustic microscopy experiments and

394 analyzed the data; all authors discussed the data; A.K.L. and A.L.J. wrote the manuscript with  
395 contributions from all authors.

396

397 **Competing Interests** The authors declare no competing interests.

398 **Correspondence and requests for materials** should be addressed to A.L.J.

399

## 400 **Materials and Methods**

### 401 **Animals.**

402 The inbred FVB/N strain was used for all proliferation rate, area, length, and expansion rate  
403 measurements. *Atoh1-CreER* (42), *Nestin-CreER* (43), *Rosa26<sup>MTMG</sup>* (44), *Rosa26<sup>Ai75</sup>* (45) were  
404 used to quantify cell shape and size as well as fiber distribution and were maintained on the  
405 outbred Swiss Webster background. The Swiss Webster strain was used for scanning acoustic  
406 microscopy. Both sexes were used for the analysis. Animals were kept on a 12 hour light/dark  
407 cycle and food and water were supplied ad libitum. All experiments were performed following  
408 protocols approved by Memorial Sloan Kettering Cancer Center's Institutional Animal Care and  
409 Use Committee.

410

411 The appearance of a vaginal plug set noon of the day as Embryonic day 0.5 (E0.5). All animals  
412 were collected within two hours of noon on the day of collection. Tamoxifen (Tm, Sigma-  
413 Aldrich) was dissolved in corn oil (Sigma-Aldrich) at 20 mg/mL. Pregnant females carrying  
414 litters with *Atoh1-CreER/+;R26<sup>MTMG/MTMG</sup>* or *NestinCER/+;R26<sup>MTMG/MTMG</sup>* embryos were given  
415 one 20 µg/g dose of TM via subcutaneous injection two days prior to analysis. 25 µg/g of 5-

416 ethynyl-2-deoxyridine (EDU; Invitrogen) was administered via subcutaneous injection one hour  
417 prior to collection.

418

### 419 **Tissue processing, immunohistochemistry, and Imaging**

420 For embryonic stages heads were fixed in 4% paraformaldehyde overnight at 4°C. For postnatal  
421 animals, the brain was dissected out first before fixation. Tissues were stored in 30% sucrose.

422 For all proliferation, area, length, and thickness measurements brains were embedded in optimal  
423 cutting temperature (OCT) compound. Parasagittal sections were collect with a Leica cryostat  
424 (CM3050s) at 10µm.

425

426 Prior to IHC, EdU was detected using a commercial kit (Invitrogen, C10340). Following EdU  
427 reaction the following primary antibodies were used either overnight at 4°C or 4 hours at room  
428 temperature: mouse anti-P27 (BD Pharmingen, 610241), rabbit anti-GFP (Life Technologies,  
429 A11122), rat anti-GFP (Nacalai Tesque, 04404-84). All antibodies were diluted to 1:500 in 2%  
430 milk (American Bioanalytical) and 0.2% Triton X-100 (Fisher Scientific). Alexa Fluor secondary  
431 antibodies (1:500; Invitrogen) were used: Alexa Fluor 488 donkey anti-rabbit, A21206, Alexa  
432 Fluor 488 donkey anti-rat, A21208, Alexa Fluor 488 donkey anti-mouse, A21202, Alexa Fluor  
433 647 donkey anti-mouse, A31571. EdU was detected using a commercial kit (Invitrogen,  
434 C10340).

435

436 For cell size, shape and fiber density analysis 60 µm parasagittal sections were collected on a  
437 Leica vibratome (VT100S). Primary and secondary antibodies were diluted 1:500 in 2% milk  
438 and incubated overnight at 4°C.



439

440 For scanning acoustic microscopy brains were processed for paraffin embedding and parasagittal  
441 sections of 10  $\mu\text{m}$  thick were collected on a microtome (Leica RM2255). Structured illumination  
442 and confocal Imaging was done with Zeiss Observer Z.1 with Apatome or Zeiss LSM 880  
443 respectively.

444

#### 445 **Quantification of Proliferation, Length, Area, Folding Index and Thickness**

446 Measurements for all analysis were taken from the three most midline sagittal sections and  
447 averaged. The most midline section was determined by dividing the distance in half between the  
448 lateral edges where the third ventricle and the mesencephalic vesicle are no longer connected.  
449 Quantifications were made using Imaris (Bitplane) and Matlab (Mathworks) software.

450

451 EGL Proliferation rate was calculated as  $\text{EDU}^+ / (\text{Dapi}^+; \text{P27}^-)$  cells. All cells were counted  
452 within the lobule region to the midpoint of the Anchoring Centers. For proliferation  
453 measurements through the ACs and the surrounding EGL at E16.5 and E17.5 a 50  $\mu\text{m}$  window  
454 measured from the outer surface of the EGL was centered at the AC. The measuring window was  
455 centered at every 25  $\mu\text{m}$  anterior and posterior to the EGL for a total distance of 250  $\mu\text{m}$  anterior  
456 and posterior to the AC. At E18.5, when the AC is fully formed, everything proximal to the  
457 centroid of the cerebellum under the midpoint of the AC was counted as the AC. Non-  
458 overlapping regions of 50  $\mu\text{m}$  also were measured in either direction for a total of 200  $\mu\text{m}$   
459 anterior and posterior to the AC. Proliferation was measured in 3 cerebella at E16.5 and E17.5  
460 and in 4 cerebella at E18.5

461

462 EGL length was measured from the outer surface of the EGL following the curvature of the  
463 EGL. Cerebellar area was calculated as the area within the outer surface of the EGL and the  
464 ventricular zone. A short strait edge was made perpendicular to the ventricular zone to close the  
465 area back upon to the anterior end of the EGL. The convex curvature of the cerebellum was  
466 measured by following only the positive curvature of the EGL. The folding index was  
467 determined as  $FI = 1 - (\text{Positive curvature}/\text{EGL length})$ . Data collected for E16.5, E17.5, E18.5  
468 and P0 came from 6,8,7, and 9 cerebella respectively.

469 EGL thickness was measured by defining the outer and inner curvature of the EGL. The shortest  
470 distance lines were drawn to the outer curvature from discrete points distributed at every 12.5  $\mu\text{m}$   
471 along the inner curvature of the EGL. Nine ACs and surrounding regions from five cerebella  
472 were quantified at E16.5 and 13 ACs from five cerebellar were analyzed at E17.5. At E18.5 six  
473 ACs from two cerebellar were quantified.

474

#### 475 **Quantification of Cell Shape**

476 Midline sections were imaged with a Zeiss LSM 880. Serial images were taken to cover the  
477 entire EGL of lobule regions L123, L45, and L678 and the ACs. Manual cell masks were created  
478 with Imaris software defining the curvature at every z-slice. Every cell that was completely  
479 included in the imaging window and that was distinguishable from surrounding cells was  
480 counted to reduce sampling bias. Cells from three brains were measured at each stage for a total  
481 of 131 at E16.5 and 201 at E18.5. Shape was defined via sphericity, which is the surface area of  
482 a sphere having the same volume as the cell of interest divided by the surface area of the cell of  
483 interest.

484

## 485 **Quantification of Fibers within the EGL**

486 Midline sections were imaged with a Zeiss LSM 880. Image tiling was used to cover the EGL.  
487 Using Python, a 4<sup>th</sup> or 5<sup>th</sup> order polynomial was fitted to the outer edge of the EGL in each  
488 image, and five scan lines were positioned at 12.2  $\mu\text{m}$  intervals beneath the surface, and parallel  
489 to it. A bin width of 50  $\mu\text{m}$  as measured along the polynomial contour was centered at the AC.  
490 Bins of equal distance were extended both anteriorly and posteriorly. Staining intensity was  
491 counted along each scan line at every z-slice of the confocal stack. Each image was normalized  
492 to the mean intensity and smoothed with a Gaussian filter. Peak counting was done using  
493 minimum and maximum filters, keeping neighborhood size and threshold parameters constant  
494 for all datasets. The results from the 5 scan lines were averaged.

495

## 496 **Tissue cutting**

497 Live cerebella of E16.5 FVB/N mice were collected in dissection buffer as previously described  
498 (46) and embedded in low-melting point agarose (Invitrogen). Sagittal slices at a thickness of  
499 250  $\mu\text{m}$  were collected. Slices were removed from the agarose and place in petri-dishes coated  
500 with Poly(2-hydroxyethyl methacrylate)(Sigma-Aldrich). Tissue cuts were made with a 30°  
501 Premier Edge stab knife (Oasis Medical). Slices were allowed to relax for 10 minutes. Time-  
502 lapse images were acquired on a Leica MZ75 dissection scope.

503

## 504 **Live Imaging Analysis**

505 Live cerebella of E16.5 Atoh1-CreER/+; R26Ai75/+ mice were collected and slices of a  
506 thickness of 250  $\mu\text{m}$  were cultured on Millicell cell culture inserts (Millipore) in glass bottom  
507 plates (Matek) as previously described (46). Image stacks were acquired on a Zeiss LSM 880 at

508 intervals of around 3.5 minutes for up to 5 hours. Cell positions were tracked using Imaris  
509 (Bitplane) software.

510

### 511 **Scanning Acoustic Microscopy**

512 Mechanical tissue properties were analyzed using a 250 MHz Scanning Acoustic Microscope  
513 (SAM), described previously (47, 48). Briefly, 12  $\mu\text{m}$  paraffin sections of mouse embryonic  
514 brains were de-paraffinized, hydrated in de-ionized water and scanned on the SAM to generate  
515 maps of amplitude, sample thickness, speed of sound, acoustic impedance, attenuation, bulk  
516 modulus, and mass density. Co-registered histology and SAM amplitude images were used to  
517 identify regions-of-interest (ROIs) corresponding to the EGL layer and underlying core of the  
518 cerebellum in each sample. Bulk modulus was analyzed as a measure of tissue stiffness: ROI  
519 measurements were acquired from 3 sections from 3 embryos at each developmental stage.

520

### 521 **Finite element simulations**

522 The wrinkle of a circular bilayer structure in Fig. 3a was simulated with commercial software  
523 ABAQUS. Both film and substrate were modeled as incompressible neo-Hookean materials. The  
524 ratio between shear moduli of the film and substrate was 50 and the initial radius of the  
525 simulated structure was 16 times that of the film thickness. The differential growth of the EGL  
526 and core was modeled by an isotropic expansion of the film in the bilayer structure.

527

528 To test the elastic wrinkling model, we conducted finite element (FE) simulations for bilayer  
529 structures with a film bonded on a substrate, which represents the EGL layer and core structure,  
530 respectively. The structures were assumed to be under 2D plane strain deformation to mimic the

531 quasi-2D nature of cerebellum wrinkles. Neo-Hookean model was adopted to describe the elastic  
532 properties of both film and substrate, whose strain energy can be expressed as

$$533 \quad U = \frac{1}{2} \mu (I_1 - 3)$$

534 where  $\mu$  is the shear modulus and  $I_1$  represents the first invariant of the right Cauchy-Green  
535 strain tensor. The Poisson's ratios for the film and substrate were set to be 0.5, based on  
536 experimental observations that the bulk modulus of EGL and core are in the order of GPa, much  
537 larger than the shear modulus of soft tissues ( $\sim$  kPa).

538

539 We carried out FE simulations through commercial software ABAQUS. A second order 6 node  
540 hybrid element (CPE6MH) was utilized to discretize the film and substrate. Very fine FE meshes  
541 were used to make sure the results independent of mesh size. To incorporate differential growth  
542 in real EGL layer and core, an isotropic growth deformation tension was applied to the modeled  
543 film by decoupling the deformation tensor  $\mathbf{F}$  into elastic deformation part  $\mathbf{A}$  and growth part  $\mathbf{G}$ .

$$544 \quad \mathbf{F} = \mathbf{A} \cdot \mathbf{G}$$

545 For simplicity, we assume the growth part is isotropic and controlled by a scalar variable  $g$

$$546 \quad \mathbf{G} = g \begin{bmatrix} 1 & 0 & 0 \\ 0 & 1 & 0 \\ 0 & 0 & 1 \end{bmatrix}$$

547 where  $g > 1$  represents a faster growth in EGL than the core. To trigger instabilities in  
548 numerical simulations, random perturbations (e.g., White Gaussian noise with  $0.001t$  mean  
549 magnitude) were applied to the nodal positions at the top surface of the film and the interface  
550 between the film and substrate.

551 To qualitatively understand the cut experiments we ran a FE simulation of a pre-cut circular  
552 bilayer structure and then assigned swelling strain to the film. This neglected the dynamical

553 process in the real cut experiments and only focused on the final equilibrium of the cerebellum  
554 after long time relaxation. All the simulation parameters were the same as those in the wrinkling  
555 simulation. The initial cut length  $a$  is equal to  $8t$ . The minimum in-plane principal stress  
556 corresponds to the hoop stress in the film.

557

### 558 **Details of multi-phase model as applied to initiation of cerebellar folds**

559 We, formulated a two-dimensional model based on the parameters of a midsagittal section of the  
560 cerebellum. The distance of the outer edge of the EGL and, hence, the outer edge of the  
561 cerebellum from the center of the cerebellum was defined as  $r(\theta)$  with  $\theta$  as the angular  
562 coordinate. We assumed that  $r(\theta)$  was single-valued. The thickness of the EGL was defined as  
563  $t(\theta)$ . See model schematic below.

564

565 Taking into account the four assumptions discussed in the main text, we constructed the  
566 following energy functional to be minimized

567

$$568 \quad E \left[ r, t, \frac{dt}{d\theta} \right] = \int d\theta \{ k_r (r - r_0)^2 - k_t (t - t_0)^2 + \beta \left( \frac{dt}{d\theta} \right)^2 \},$$

569

570 with  $k_r$  as the stiffness modulus (a spring constant in one-dimension) of the radial glial fibers and  
571 the pial surface contained in the meninges surrounding the cerebellum since the cerebellar radius  
572 is proportional to its perimeter,  $r_0$  as the preferred radius of the cerebellum,  $k_t$  denoting a growth  
573 potential due to cell proliferation,  $t_0$  as thickness of the EGL (cortex), and,  $\beta$  quantified the  
574 mechanical resistance to changing the thickness of the EGL. Given our first assumption of an  
575 incompressible cerebellar core, we imposed the constraint

576

$$577 \quad \frac{1}{2} \int d\theta (r - t)^2 = A_0,$$

578

579 with  $A_0$  as a preferred cerebellar area. We applied the variational principle to minimize the

580 energy functional subject to the core constraint, i.e.

581

$$582 \quad \delta(E - \mu \int d\theta (r - t)^2) = 0,$$

583

584 where  $\mu$  is a Lagrange multiplier. Assuming the preferred radius of the cerebellum is constant

585 and the thickness of the EGL/cortex is also constant, then the preferred cerebellar shape was a

586 circle and the EGL an annulus.

587

588 The variational analysis yielded the following equation of shape for  $t(\theta)$ ;

589

$$590 \quad \frac{d^2 t}{d\theta^2} + q^2 t(\theta) = \frac{k_t}{\beta} \left( t_0 + \frac{\frac{\mu r_0}{k_t}}{1 - \frac{\mu}{k_r}} \right),$$

591

592 with  $q^2 = \frac{k_t}{\beta} \left( 1 + \frac{\frac{\mu}{k_t}}{1 - \frac{\mu}{k_r}} \right)$ . The solution to the equation of shape was

593

$$594 \quad t(\theta) = A_t \sin(q\theta + \phi) + C_1(r_0, t_0, k_r, k_t, \mu),$$

595 with  $C_1$  independent of  $\theta$  and  $A_t = \sqrt{2} \left(1 - \frac{\mu}{k_r}\right) \sqrt{\frac{A_0}{\pi} - C_2(r_0, t_0, k_r, k_t, \mu)}$  such that  $A_0 > \pi C_2$ .

596 There was an additional equation of shape for  $r(\theta)$  from the variational principle that depended  
597 on  $t(\theta)$  and so was determined

$$598 \quad r(\theta) = -\frac{\frac{\mu}{k_r}}{1 - \frac{\mu}{k_r}} A_t \sin(q\theta + \phi) + C_3(r_0, k_r, \mu).$$

599 We used the measured data at E16.5 to set the parameters to make predictions for the shape of  
600 both the EGL and core (and so the relationship between the two) at later times. Plots assumed a  
601 circular preferred shape, and with other parameters as follows:  $\epsilon = \mu/k_r$  is shown in Fig. 5f,  $c =$   
602  $k_r/k_t = 0.06/\epsilon$ ,  $A_t/r_0 = \epsilon/9.6$ ,  $t_0/r_0 = \epsilon/4.8$ , and  $q = 6$ . Note that for  $\epsilon = 0.3$ , these  
603 parameters are numerically consistent with our E16.5 measurements:  $A_t/t_0 =$

604  $0.5$  and  $r_0/t_0 = 16$ , as well as the observed number of invaginations in the half circle:  $q/2 = 3$ .

605 All of these parameters are either constant or depend on the time-like parameter  $\epsilon$ . One of these  
606 dependencies has a functional form that is physically justifiable ( $A_t \sim \epsilon$ ), another has a form that  
607 is biologically justifiable ( $c \sim 1/\epsilon$ ), owing to the decrease in the number of radial glia over time.

608

609 We defined a dimensionless “shape factor” as half of the perimeter divided by the square root of  
610 half of the area as appropriate for a semi-circle. To compare the model’s predictive deviation of  
611 this quantity from the semi-circular value we assumed a linear relationship between  $\epsilon$  and time  $t$   
612 measured in embryonic days:  $\epsilon(t) = 0.3(t-15.5)$ .

613

## 614 **Statistical analyses**

615 Statistical analyses were performed using Matlab software. Significance was determined at  $P <$

616  $0.05$ . Two-way ANOVA was used for proliferation analysis as two variables were tracked,



617 mouse and region. Cell shape, volume, fiber distribution, EGL thickness and bulk modulus were  
618 run under a standard ANOVA. After ANOVA analysis a multiple comparison was run with  
619 Tukey's honestly significant difference criterion. F-test for variance and two-tailed student's  
620 paired t-test were used for slice cutting and relaxation quantifications. The degrees of freedom,  
621 where appropriate, and P values are given in the figure legends. All error bars are standard  
622 deviations. No statistical methods were used to predetermine the sample sizes. We used sample  
623 sizes aligned with the standard in the field. No randomization was used nor was data collection  
624 or analysis performed blind.

625

#### 626 **Data Availability**

627 Data that support the findings of this study are available from the corresponding authors upon  
628 reasonable request.

629

#### 630 **Supplemental Movie Text**

631 **Movie S1:** Live slice cutting and relaxation reveals circumferential tension along the EGL.

632 Time-lapse movie shows relaxation of live tissue slice after cutting radially through the EGL and  
633 into the underlying core. Images were acquired every 10 seconds for 10 minutes. The time-lapse  
634 was started moments after the tissue was collected in frame after the cut. The slice shown in the  
635 video is the same as in Fig.2 f-h.

636

637 **Movie S2:** Live slice cutting and relaxation reveals radial tension between the EGL and

638 The VZ. Time-lapse movie shows relaxation of live tissue slice after cutting horizontally into the  
639 core between the EGL and the VZ. Images were acquired every 10 seconds for 10 minutes. The

640 time-lapse was started moments after the tissue was collected in frame after the cut. The Slice  
641 shown in the video is the same as in Fig. 4c-e.

642

643 **Movie S3:** Live slice imaging reveals fluid-like behavior in the EGL. Time-lapse movie shows  
644 dynamic cell rearrangement of progenitors within the EGL. Image stacks were acquired every  
645 ~3.5 minutes for 5 hours. Cells undergo mixing and neighbor exchange in the tens to hundreds of  
646 minutes.

647

648 **Movie S4:** Live slice imaging reveals fluid-like behavior in the EGL. Time-lapse shown in  
649 Movie S3, with a subset of cells tracked through time and their positions marked with colored  
650 spheres.

651 **References:**

- 652 1. Tallinen T, Chung JY, Biggins JS, Mahadevan L. Gyrfication from constrained cortical  
653 expansion. *Proc Natl Acad Sci U S A*. 2014;111(35):12667-72.
- 654 2. Ronan L, Voets N, Rua C, Alexander-Bloch A, Hough M, Mackay C, et al. Differential  
655 tangential expansion as a mechanism for cortical gyrfication. *Cereb Cortex*.  
656 2014;24(8):2219-28.
- 657 3. Bayly PV, Okamoto RJ, Xu G, Shi Y, Taber LA. A cortical folding model incorporating  
658 stress-dependent growth explains gyral wavelengths and stress patterns in the developing  
659 brain. *Phys Biol*. 2013;10(1):016005.
- 660 4. Xu G, Knutsen AK, Dikranian K, Kroenke CD, Bayly PV, Taber LA. Axons pull on the  
661 brain, but tension does not drive cortical folding. *J Biomech Eng*. 2010;132(7):071013.
- 662 5. Hohlfeld E, Mahadevan L. Unfolding the sulcus. *Phys Rev Lett*. 2011;106(10):105702.
- 663 6. Bayly PV, Taber LA, Kroenke CD. Mechanical forces in cerebral cortical folding: a  
664 review of measurements and models. *J Mech Behav Biomed Mater*. 2014;29:568-81.
- 665 7. Lejeune E, Javili A, Weickenmeier J, Kuhl E, Linder C. Tri-layer wrinkling as a  
666 mechanism for anchoring center initiation in the developing cerebellum. *Soft Matter*.  
667 2016;12(25):5613-20.
- 668 8. Karzbrun E, Kshirsagar A, Cohen SR, Hanna JH, Reiner O. Human Brain Organoids on a  
669 Chip Reveal the Physics of Folding. *Nature physics*. 2018;14(5):515-22.
- 670 9. Tallinen T, Chung JY, Rousseau F, Girard N, Lefèvre J, Mahadevan L. On the growth  
671 and form of cortical convolutions. *Nature Physics*. 2016;12:588-93.
- 672 10. Engstrom TA, Zhang T, Lawton AK, Joyner AL, Schwarz JM. Buckling without  
673 Bending: A New Paradigm in Morphogenesis. *Phys Rev X*. 2018;8(4).
- 674 11. Leto K, Arancillo M, Becker EB, Buffo A, Chiang C, Ding B, et al. Consensus Paper:  
675 Cerebellar Development. *Cerebellum*. 2016;15(6):789-828.
- 676 12. Legue E, Riedel E, Joyner AL. Clonal analysis reveals granule cell behaviors and  
677 compartmentalization that determine the folded morphology of the cerebellum.  
678 *Development*. 2015;142(9):1661-71.
- 679 13. Legue E, Gottshall JL, Jaumouille E, Rosello-Diez A, Shi W, Barraza LH, et al.  
680 Differential timing of granule cell production during cerebellum development underlies  
681 generation of the foliation pattern. *Neural Dev*. 2016;11(1):17.
- 682 14. Sudarov A, Joyner AL. Cerebellum morphogenesis: the foliation pattern is orchestrated  
683 by multi-cellular anchoring centers. *Neural Dev*. 2007;2:26.
- 684 15. Richman DP, Stewart RM, Hutchinson JW, Caviness VS, Jr. Mechanical model of brain  
685 convolutional development. *Science*. 1975;189(4196):18-21.
- 686 16. Nelson CM. On Buckling Morphogenesis. *J Biomech Eng*. 2016;138(2):021005.
- 687 17. Hannezo E, Prost J, Joanny JF. Mechanical instabilities of biological tubes. *Phys Rev*  
688 *Lett*. 2012;109(1):018101.
- 689 18. Shyer AE, Tallinen T, Nerurkar NL, Wei Z, Gil ES, Kaplan DL, et al. Villification: how  
690 the gut gets its villi. *Science*. 2013;342(6155):212-8.
- 691 19. Wiggs BR, Hrousis CA, Drazen JM, Kamm RD. On the mechanism of mucosal folding  
692 in normal and asthmatic airways. *J Appl Physiol (1985)*. 1997;83(6):1814-21.
- 693 20. Szulc KU, Lerch JP, Nieman BJ, Bartelle BB, Friedel M, Suero-Abreu GA, et al. 4D  
694 MEMRI atlas of neonatal FVB/N mouse brain development. *Neuroimage*.  
695 2015;118:49-62.
- 696

- 697 21. Mota B, Herculano-Houzel S. BRAIN STRUCTURE. Cortical folding scales universally  
698 with surface area and thickness, not number of neurons. *Science*. 2015;349(6243):74-7.
- 699 22. Allen HG. Analysis and design of structural sandwich panels. 1st ed. Oxford, New York,:  
700 Pergamon Press; 1969. xvi, 283 p. p.
- 701 23. Zhao R, Zhao X. Multimodal Surface Instabilities in Curved Film–Substrate Structures.  
702 *Journal of Applied Mechanics*. 2017;84(8):081001--13.
- 703 24. Budday S, Sommer G, Haybaeck J, Steinmann P, Holzapfel GA, Kuhl E. Rheological  
704 characterization of human brain tissue. *Acta Biomater*. 2017;60:315-29.
- 705 25. Mammoto T, Ingber DE. Mechanical control of tissue and organ development.  
706 *Development*. 2010;137(9):1407-20.
- 707 26. Harding MJ, McGraw HF, Nechiporuk A. The roles and regulation of multicellular  
708 rosette structures during morphogenesis. *Development*. 2014;141(13):2549-58.
- 709 27. Stemple DL. Structure and function of the notochord: an essential organ for chordate  
710 development. *Development*. 2005;132(11):2503-12.
- 711 28. He B, Doubrovinski K, Polyakov O, Wieschaus E. Apical constriction drives tissue-scale  
712 hydrodynamic flow to mediate cell elongation. *Nature*. 2014;508(7496):392-6.
- 713 29. Leung AW, Li JYH. The Molecular Pathway Regulating Bergmann Glia and Folia  
714 Generation in the Cerebellum. *Cerebellum*. 2018;17(1):42-8.
- 715 30. Yuasa S. Bergmann glial development in the mouse cerebellum as revealed by tenascin  
716 expression. *Anat Embryol (Berl)*. 1996;194(3):223-34.
- 717 31. Yamada K, Watanabe M. Cytodifferentiation of Bergmann glia and its relationship with  
718 Purkinje cells. *Anat Sci Int*. 2002;77(2):94-108.
- 719 32. Van Essen DC. A tension-based theory of morphogenesis and compact wiring in the  
720 central nervous system. *Nature*. 1997;385(6614):313-8.
- 721 33. Li K, Leung AW, Guo Q, Yang W, Li JY. Shp2-dependent ERK signaling is essential for  
722 induction of Bergmann glia and foliation of the cerebellum. *The Journal of neuroscience :*  
723 *the official journal of the Society for Neuroscience*. 2014;34(3):922-31.
- 724 34. Sillitoe RV, Joyner AL. Morphology, molecular codes, and circuitry produce the three-  
725 dimensional complexity of the cerebellum. *Annual review of cell and developmental*  
726 *biology*. 2007;23:549-77.
- 727 35. Rahimi-Balaei M, Afsharinezhad P, Bailey K, Buchok M, Yeganeh B, Marzban H.  
728 Embryonic stages in cerebellar afferent development. *Cerebellum Ataxias*. 2015;2:7.
- 729 36. Gotz M, Hartfuss E, Malatesta P. Radial glial cells as neuronal precursors: a new  
730 perspective on the correlation of morphology and lineage restriction in the developing  
731 cerebral cortex of mice. *Brain Res Bull*. 2002;57(6):777-88.
- 732 37. Reillo I, de Juan Romero C, Garcia-Cabezas MA, Borrell V. A role for intermediate  
733 radial glia in the tangential expansion of the mammalian cerebral cortex. *Cereb Cortex*.  
734 2011;21(7):1674-94.
- 735 38. Hansen DV, Lui JH, Parker PR, Kriegstein AR. Neurogenic radial glia in the outer  
736 subventricular zone of human neocortex. *Nature*. 2010;464(7288):554-61.
- 737 39. Heng X, Guo Q, Leung AW, Li JY. Analogous mechanism regulating formation of  
738 neocortical basal radial glia and cerebellar Bergmann glia. *Elife*. 2017;6.
- 739 40. Nowakowski TJ, Pollen AA, Sandoval-Espinosa C, Kriegstein AR. Transformation of the  
740 Radial Glia Scaffold Demarcates Two Stages of Human Cerebral Cortex Development.  
741 *Neuron*. 2016;91(6):1219-27.

- 742 41. Andersen BB, Korbo L, Pakkenberg B. A quantitative study of the human cerebellum  
743 with unbiased stereological techniques. *The Journal of comparative neurology*.  
744 1992;326(4):549-60.
- 745 42. Machold R, Fishell G. Math1 is expressed in temporally discrete pools of cerebellar  
746 rhombic-lip neural progenitors. *Neuron*. 2005;48(1):17-24.
- 747 43. Isaka F, Ishibashi M, Taki W, Hashimoto N, Nakanishi S, Kageyama R. Ectopic  
748 expression of the bHLH gene Math1 disturbs neural development. *Eur J Neurosci*.  
749 1999;11(7):2582-8.
- 750 44. Muzumdar MD, Tasic B, Miyamichi K, Li L, Luo L. A global double-fluorescent Cre  
751 reporter mouse. *Genesis*. 2007;45(9):593-605.
- 752 45. Daigle TL, Madisen L, Hage TA, Valley MT, Knoblich U, Larsen RS, et al. A Suite of  
753 Transgenic Driver and Reporter Mouse Lines with Enhanced Brain-Cell-Type Targeting  
754 and Functionality. *Cell*. 2018;174(2):465-80 e22.
- 755 46. Wojcinski A, Lawton AK, Bayin NS, Lao Z, Stephen DN, Joyner AL. Cerebellar granule  
756 cell replenishment postinjury by adaptive reprogramming of Nestin(+) progenitors. *Nat*  
757 *Neurosci*. 2017;20(10):1361-70.
- 758 47. Rohrbach D, Lloyd HO, Silverman RH, Mamou J. Fine-resolution maps of acoustic  
759 properties at 250 MHz of unstained fixed murine retinal layers. *J Acoust Soc Am*.  
760 2015;137(5):EL381-7.
- 761 48. Rohrbach D, Silverman RH, Chun D, Lloyd HO, Urs R, Mamou J. Improved High-  
762 Frequency Ultrasound Corneal Biometric Accuracy by Micrometer-Resolution Acoustic-  
763 Property Maps of the Cornea. *Transl Vis Sci Technol*. 2018;7(2):21.

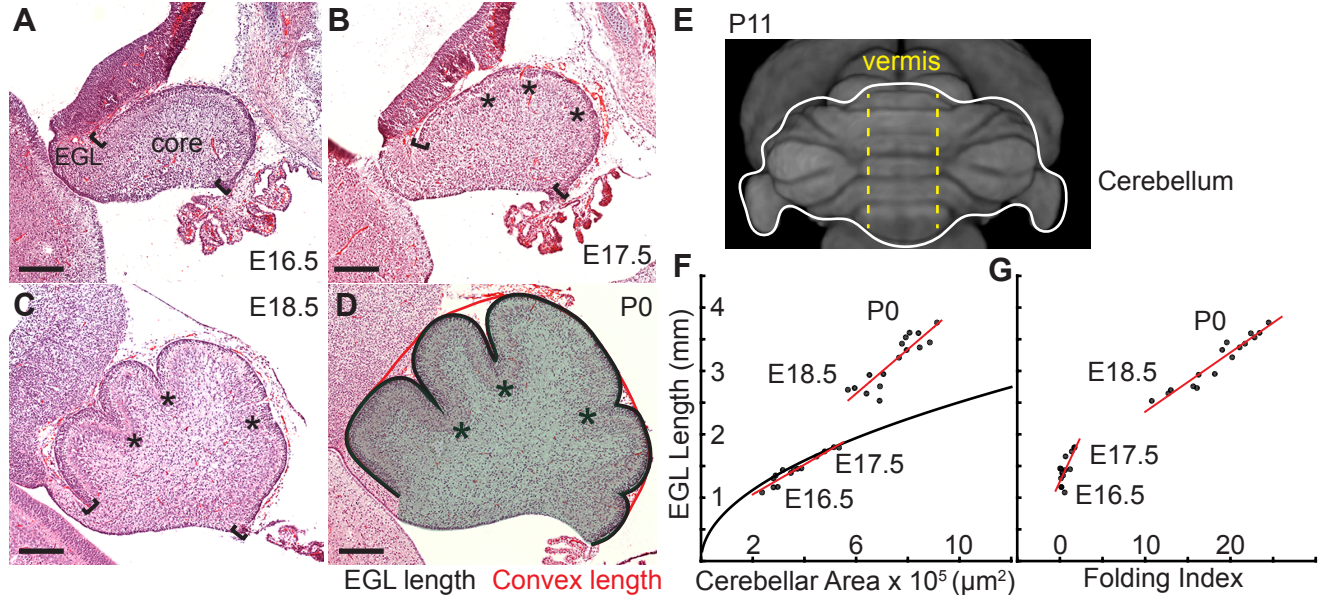

Fig. 1. Initiation of cerebellar folding correlates with timing of differential expansion. (A-D), H&E stained midline sagittal sections of FVB/N mice at the indicated embryonic (E) and postnatal days (P). Anterior to the left. Stars: ACs. Brackets: anterior/posterior ends of the EGL. Black line and red line in (D): EGL and convex length, respectively. Shaded area: core. (E) manganese enhanced magnetic resonance imaging of P11 cerebellum outlined in white adapted from (20). Anterior to the top. Vermis indicated by dotted yellow lines. (F), At E16.5 and E17.5 expansion of EGL length and cerebellar area fit the proportional expansion of a semi-circle (curve). At E18.5 and P0 EGL expansion is greater than core area growth creating differential expansion. (G), Folding index [ $1 - (\text{convex length}/\text{EGL length}) \times 100$ ] reveals folding initiates during differential expansion. Scale bars: 200  $\mu\text{m}$ .



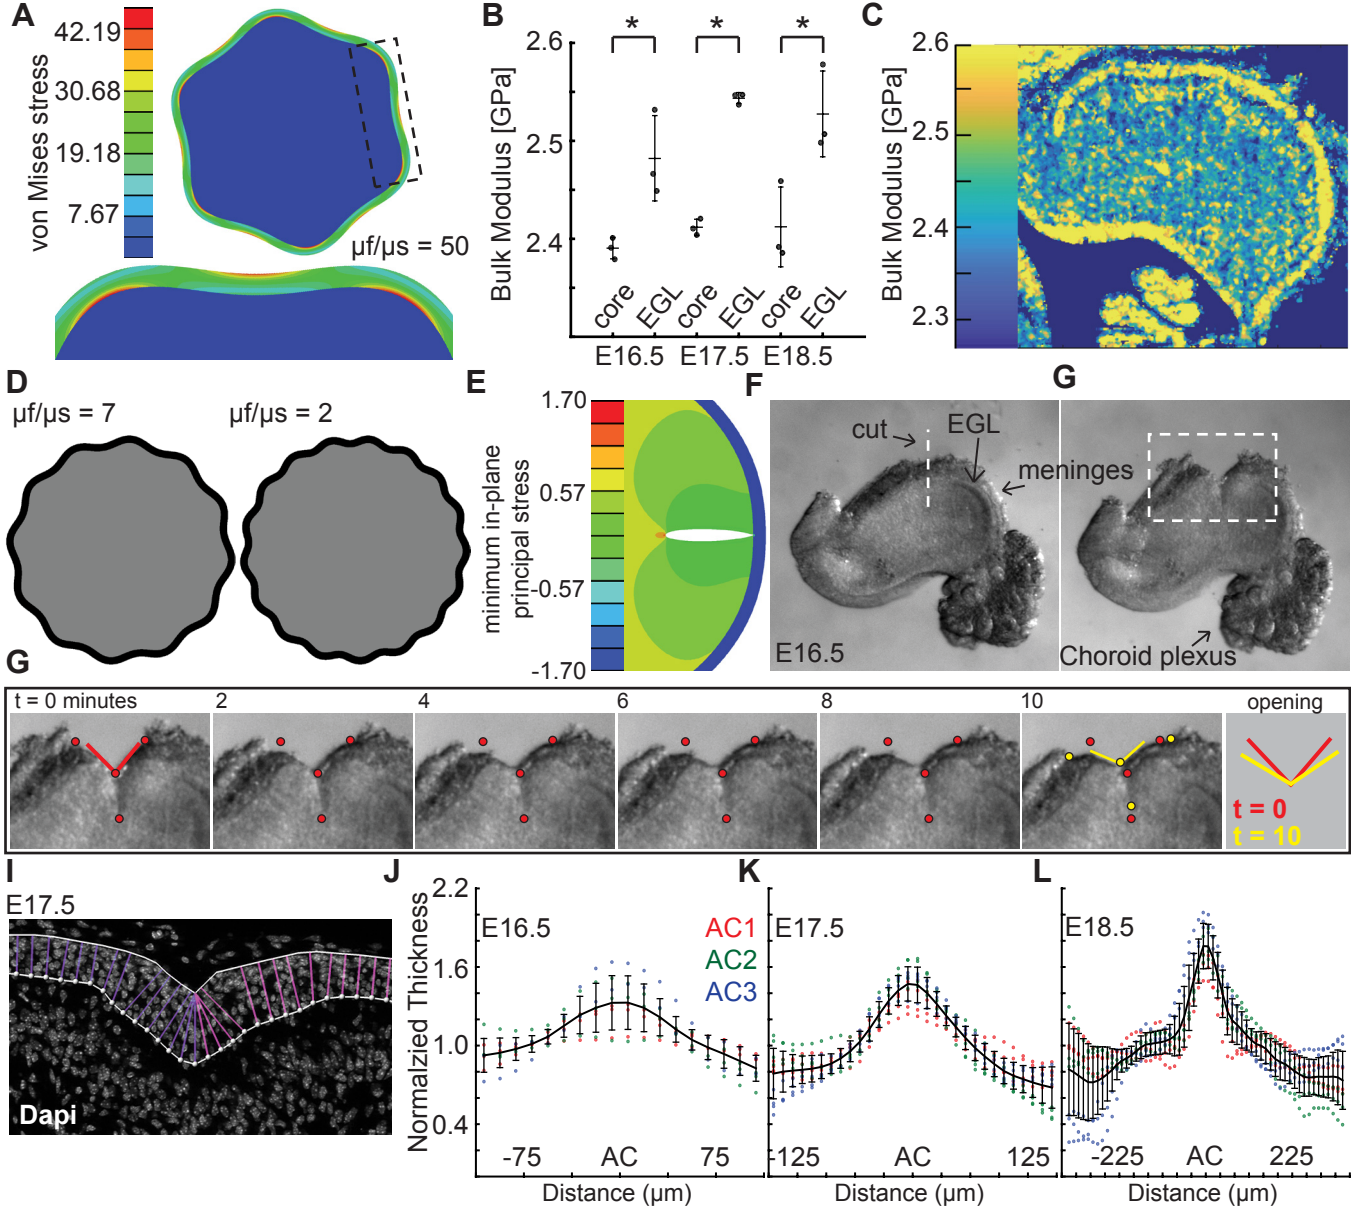

Fig. 2. Measured tissue stiffness, stress, and shape at folding initiation are inconsistent with wrinkling models. (A), Inducing the correct number of folds through a wrinkling model requires a stiffness differential between the layers of 50 fold ( $\mu f/\mu s = 50$ ,  $g = 1.05$ ). (B,C) Acoustic mapping of cerebellar slices show a slightly stiffer EGL than core at each stage (anova  $df = 5$ ;  $P = 1.0e^{-4}$   $F = 13.59$ ), but not the required differential. Stars indicate statistical differences. (D) Wrinkling simulations constrained by developmental data produce wavelengths inconsistent with the embryonic mouse cerebellum. (E) Elastoc simulations predict the EGL remains closed after cutting. (F,G) Images of a live cerebellar slice before and after cutting, and images from time lapse movie, (H) show the EGL opens, revealing circumferential tension along the EGL. Red and yellow dots: cut edges. Lines: relaxation angle. (I) Staining of nuclei with EGL outlined and lines used to measure thickness. (J-L) Normalized EGL thickness (thickness/mean thickness) at the ACs increases during folding initiation (anova E16.5  $df = 29$ ,  $P = 8.2e^{-20}$   $F = 12.59$ . E17.5  $df = 29$ ,  $P = 3.4e^{-116}$   $F = 62.78$ , E18.5  $df = 57$ ,  $P = 6.8e^{-67}$   $F = 13.28$ ). At E16.5 only brains with visible ACs were included. Error bars: S.D.

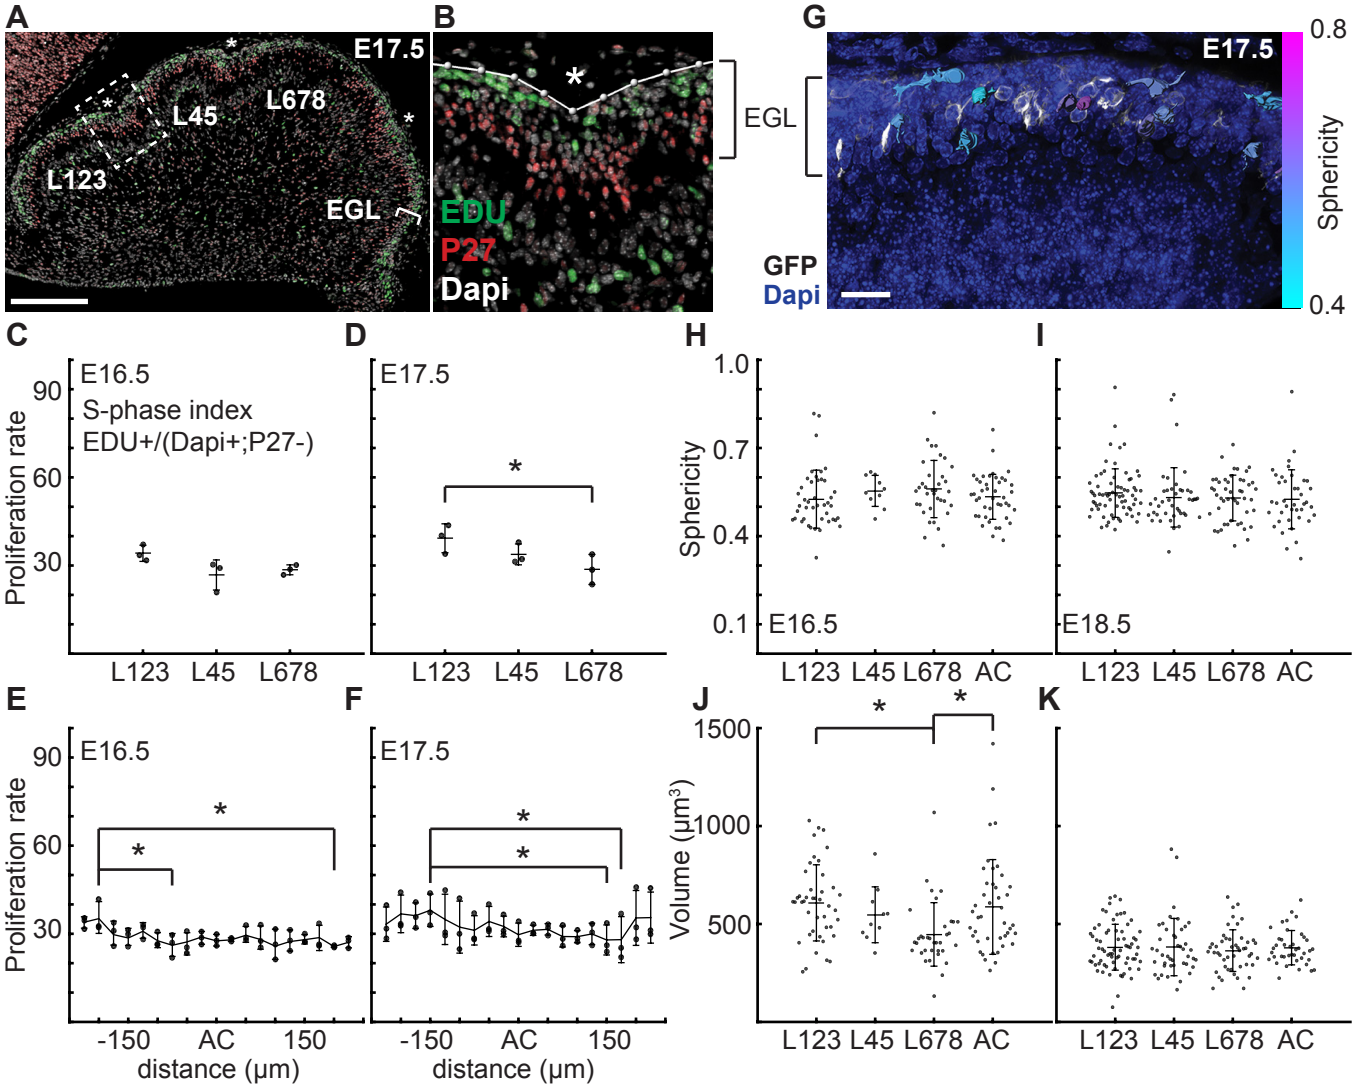

Fig. 3. At folding initiation the EGL has uniform proliferation, cell size, and cell shape. (A,B) Low and high power images of immuno-histochemical (IHC) staining of sagittal cerebellar sections to measure proliferation in the lobules (L) indicated at 25  $\mu\text{m}$  windows surrounding the ACs (stars). Scale bar: 200  $\mu\text{m}$ . (C,D) EGL proliferation rates are shown before and during the onset of invagination (Two-way anova: df = 2. (C)  $P = 0.10$ ,  $F = 4.36$  (D)  $P = 0.03$ ,  $F = 10.31$ ). (E,F) Proliferation rates are shown in the AC and in the surrounding EGL showing uniformity (Two-way anova: df = 18. (E)  $P = 0.03$ ,  $F = 2.15$  (F)  $P = 2.1 \times 10^{-3}$ ,  $F = 3.06$ ). (G) Section of *Atoh1-CreER/+; R26<sup>MTMG/+</sup>* E17.5 cerebellum showing masked labeled cells. Scale bar: 20  $\mu\text{m}$ . (H,I) Cell shape (sphericity) measurements before and during folding (anova df = 3. (H)  $P = 0.34$ ,  $F = 1.13$  (I)  $P = 0.61$ ,  $F = 0.61$ ). (J,K) Cell size measurements before and during folding (anova df = 3. (J)  $P = 3.6 \times 10^{-3}$ ,  $F = 4.75$ , (K)  $P = 0.85$ ,  $F = 0.26$ ). Stars indicate statistical differences. Error bars: S.D.



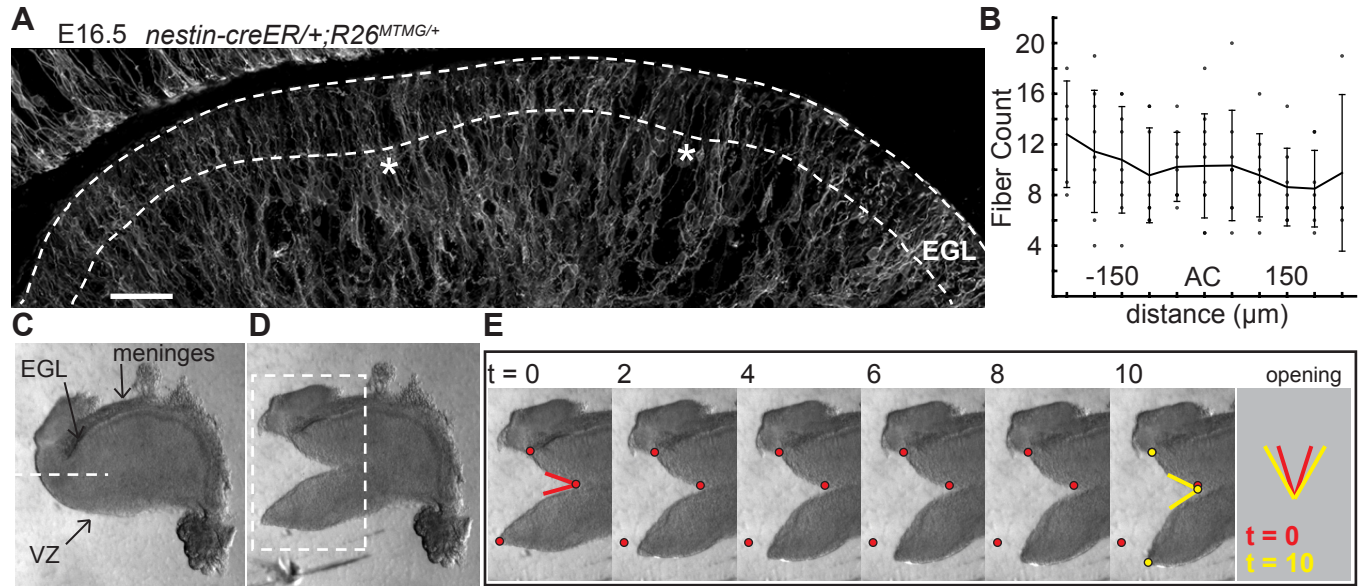

**Fig. 4.** The EGL has a uniform distribution of crossing fibers at folding initiation. (A) E16.5 *nestin-CreER/+; R26<sup>MTMG/+</sup>* cerebellum section showing fluorescent labeling of radial and Bergmann glial fibers. Stars: AC. Dotted lines denote EGL. Scale bar: 50 μm. (B) Measurements of fiber density in the ACs compared to the surrounding EGL (anova df = 10; P = 0.76, F = 0.66). Error bars: S.D. (C-E) Still images of a tissue cutting experiment to test for radial tension between the EGL and the VZ. Red and yellow dots: cut edges at t = 0, 10. Lines: relaxation angle.

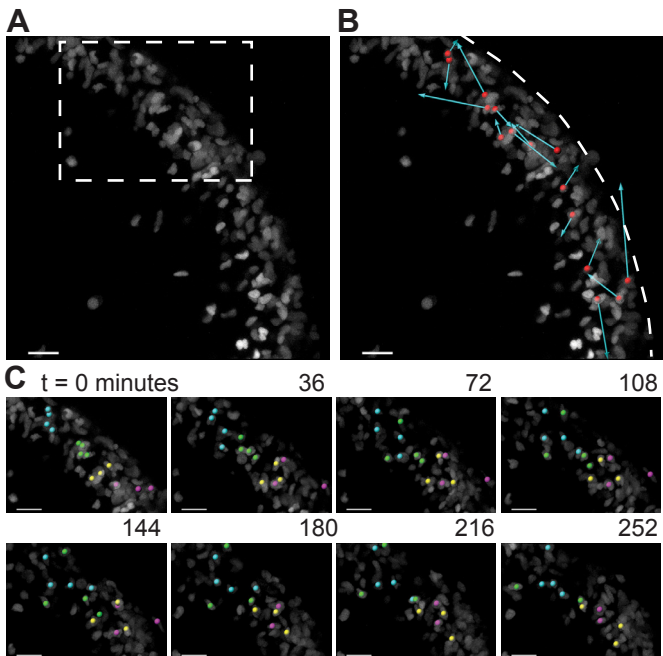

Fig. 5. During folding initiation, cells within the EGL are motile and undergo rearrangement. (A) Image of E16.5 live cerebellar slice (*Atoh1-creER/+ R26<sup>Ai75/+</sup>*) showing scattered labeling within the EGL. (B) Red dots indicate starting position, displacement arrows show final position of marked cells after 5 hours. White dashed line indicates outer edge of EGL. (C) Still images from timelapse, inset above. Cells tracked and marked with colored spheres exchange nearest neighbors over a time-scale of tens of minutes. Scale bars are 20  $\mu\text{m}$ .

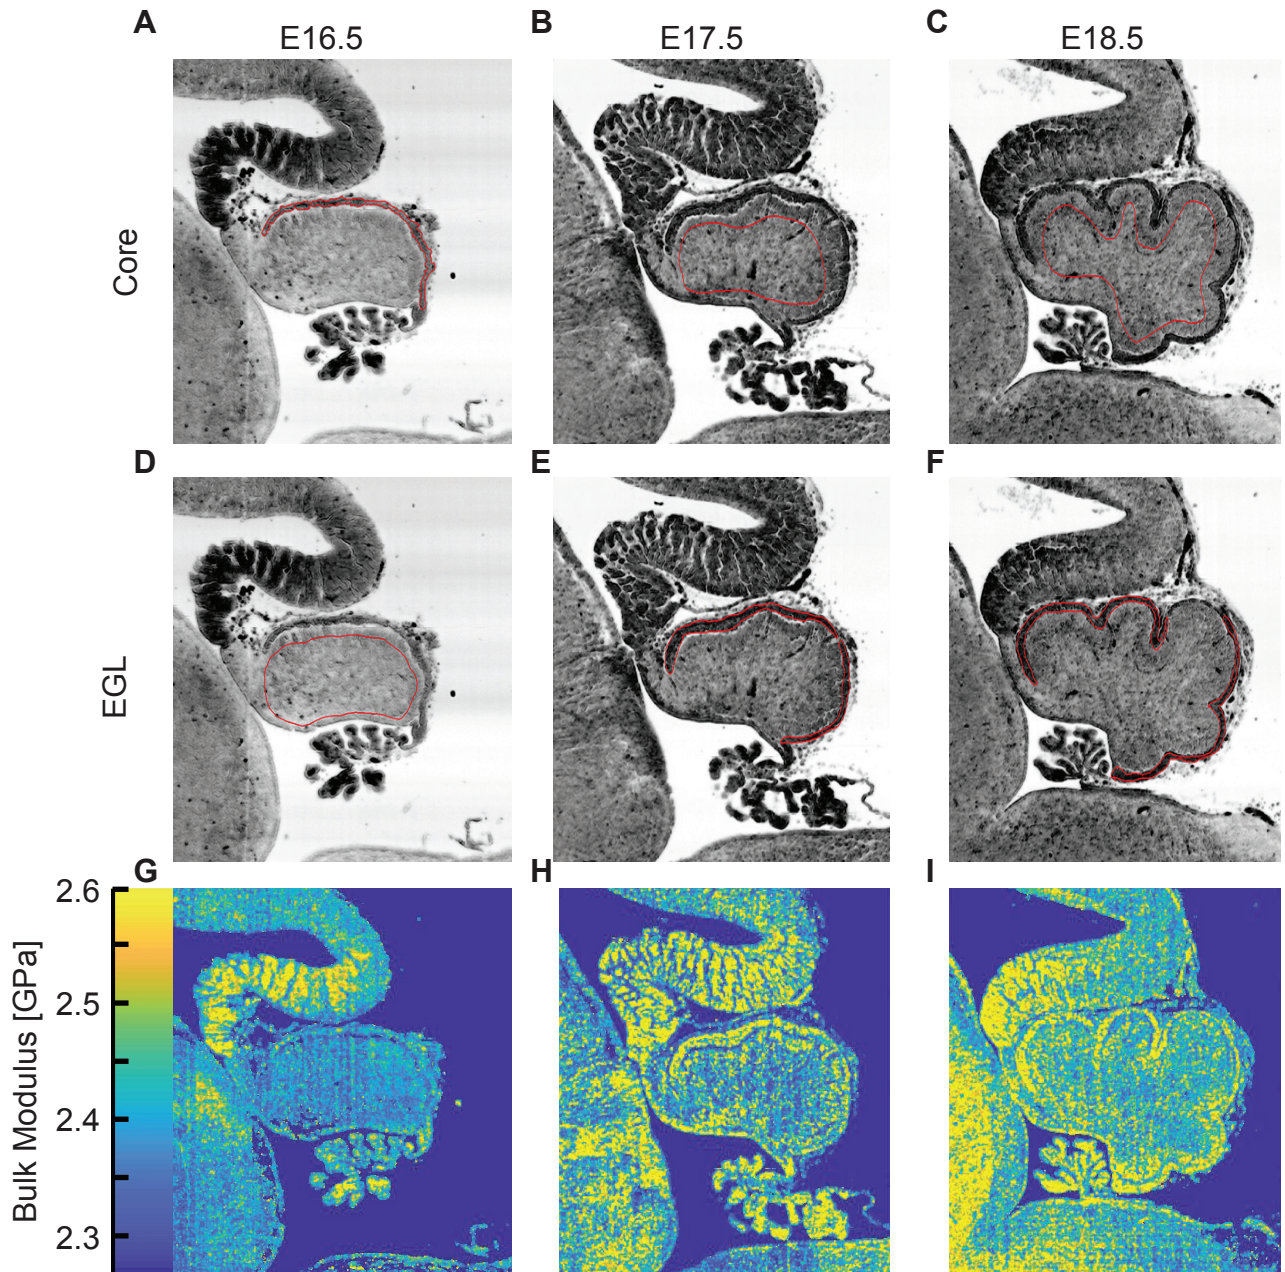

Fig. S1. Examples of the regions measured regions by acoustic microscopy. (A-F) Examples of the Region of Interest (ROI) measured for each for core and EGL. (H-J), Representative bulk modulus maps.

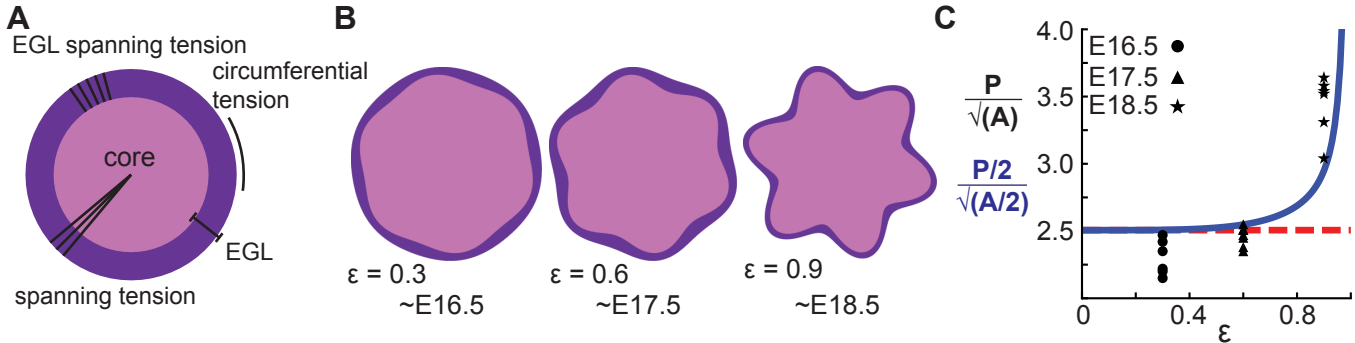

Fig. 6. A multiphase model with radial and circumferential constraints and liquid-fibrous EGL composition approximates evolution of cerebellar shape. (A) Schematic of multiphase model showing types of tension. (B) Thickness variations that arise concomitant with folding approximate those seen in the cerebellum. (C) Shape factor analysis: model for semicircle (red), multi-phase model shape prediction (blue) and actual shape measured from sections (black). Assumed linear relationship between  $\varepsilon$  and time,  $\varepsilon(t) = 0.3(t - 15.5)$ .



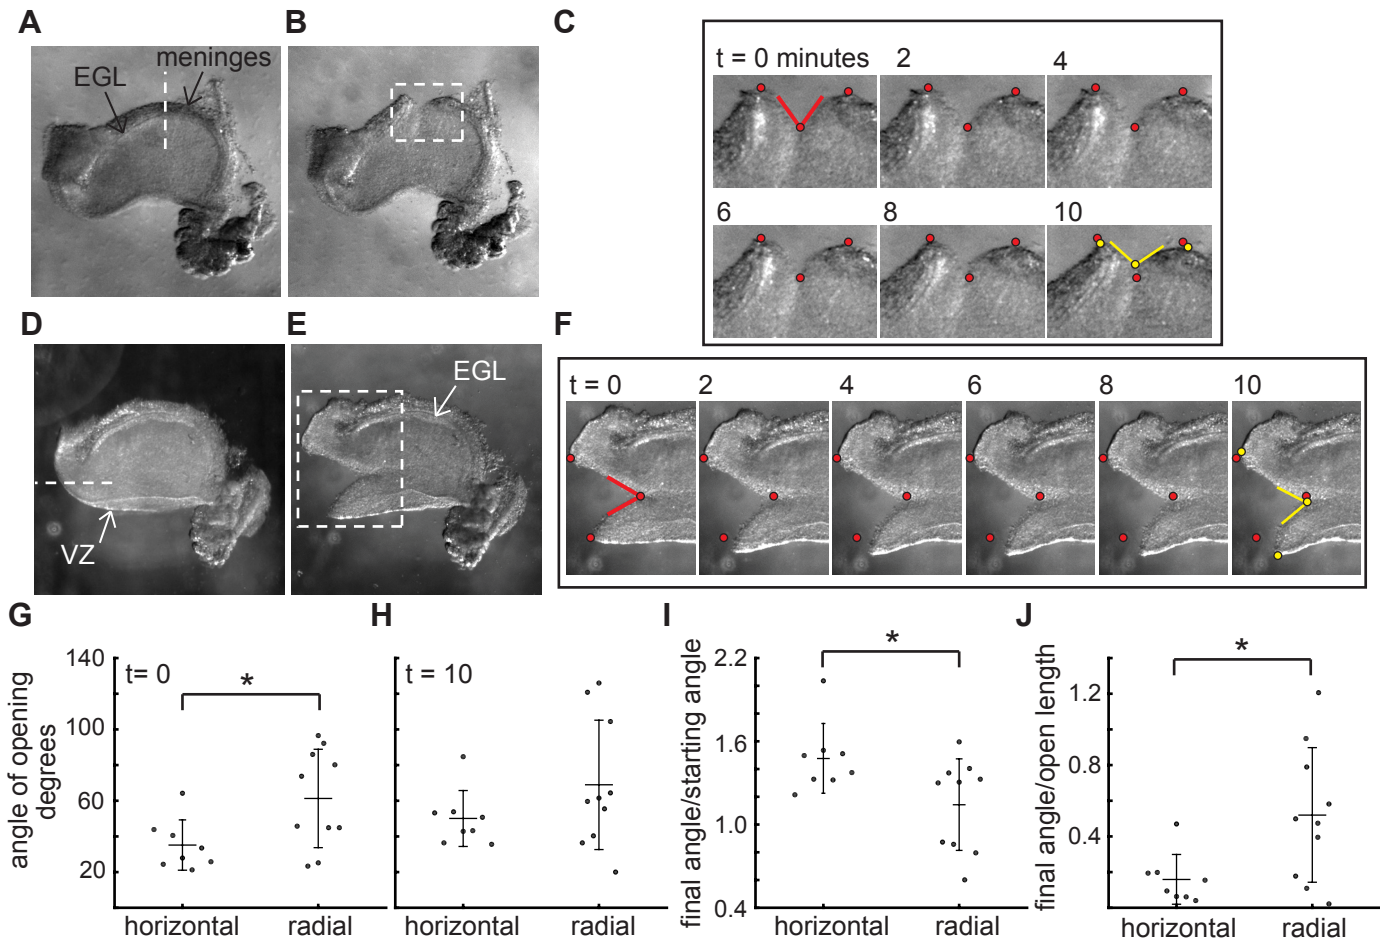

Fig. S2. The stress patterns within the cerebellum are different between the EGL and the VZ. (A-C), Example of a live cerebellar slice before (A) and after (B) a radial cut through the EGL, and still images from a time-lapse (C). Time = 0 minutes is at the time it takes to remove the knife and start the imaging, therefore the cut has already begun opening. (D-F) Example of a live cerebellar slice before (D) and after (E) a horizontal cut through between the EGL and ventricular zone (VZ), and still images from a movie (F). (G-I) radial cuts through the EGL open more quickly initially than horizontal cuts between the EGL and the Ventricular zone, but the latter continue to relax for longer ((G) f-test for unequal variance  $P = 0.09$ , two tailed t-test  $df = 16$ ,  $p = 0.03$ ,  $T = -2.43$ ; (H) f-test  $P = 0.04$  and unequal variance two-tailed t-test  $df = 12.8$   $P = 0.16$ ,  $T = -1.48$ ; (I) f-test  $P = 0.49$  and two tailed t-test  $df = 16$ ,  $P = 0.03$ ,  $T = 2.43$ ). (J) The degree of opening is tightly related to the length of the opening in horizontal cuts but not in radial cuts (f-test  $P = 0.02$ , unequal variance two tailed t-test  $df = 11.89$ ,  $P = 0.02$ ,  $T = -2.80$ ). Stars: statistical differences. Error bars: S.D.

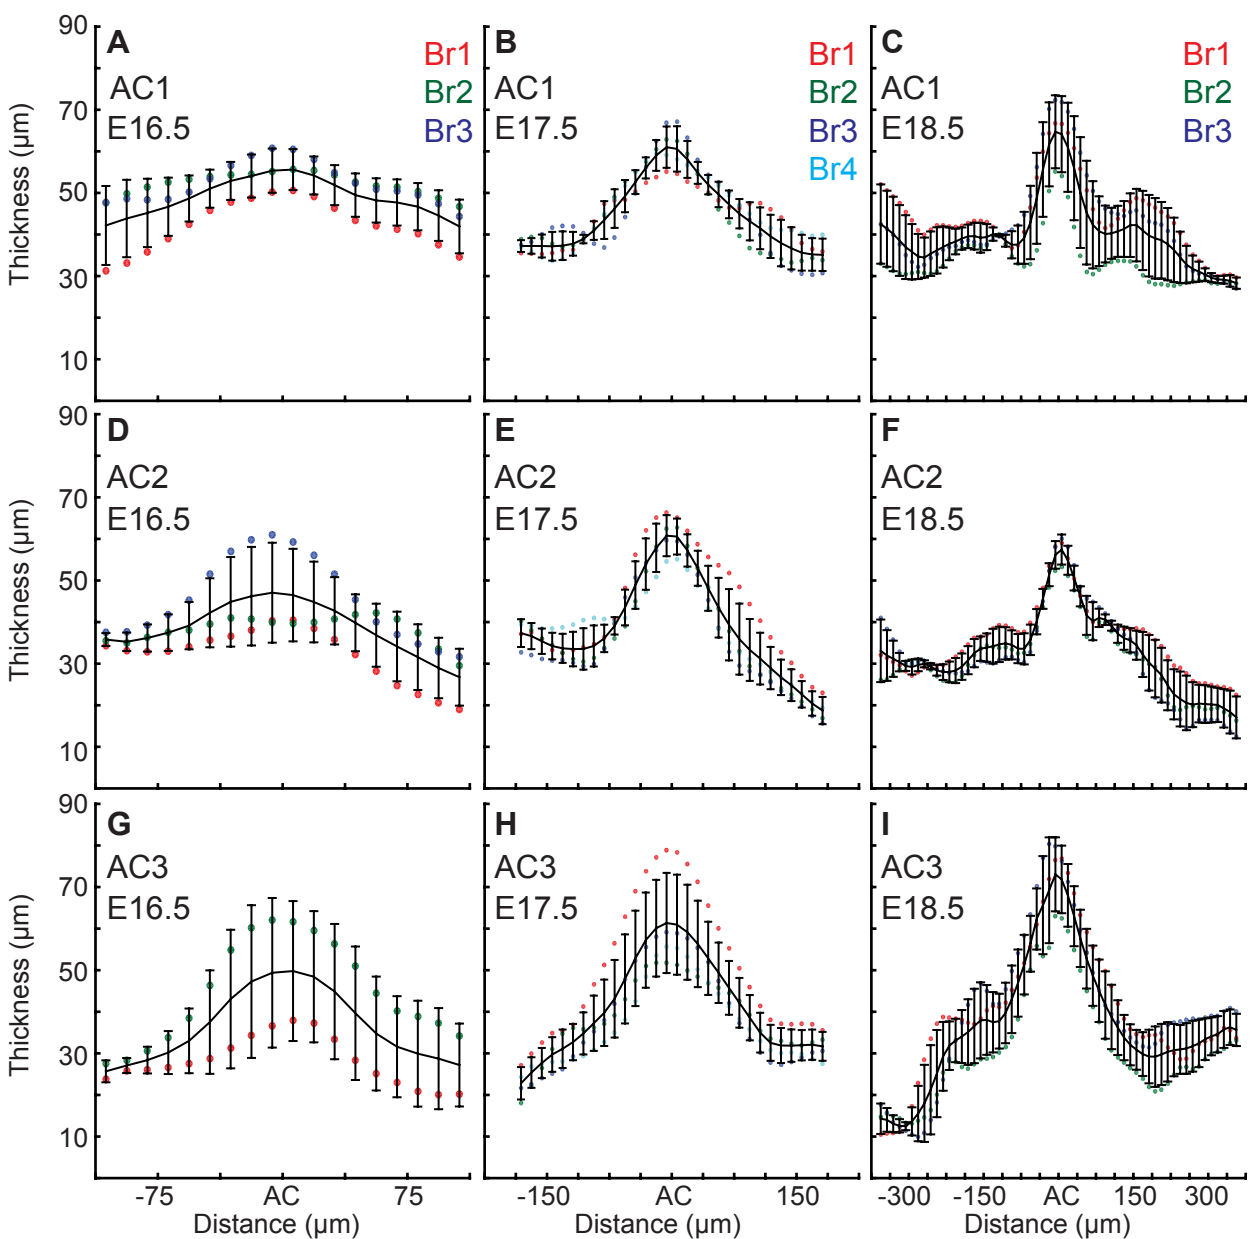

Fig. S3. EGL thickness increases in the ACs during the initiation of folding. Only E16.5 cerebella that showed regional thickening in the geometry where ACs normally arise were used for the measurements, and one embryo did not yet have an AC3. (A-C) Thickness variation in and surrounding AC1 (anova (A)  $df = 17$ ,  $P = 0.13$ ,  $F = 1.55$  (B)  $df = 29$ ,  $P = 7.0e^{-14}$   $F = 6.82$  (C)  $df = 57$ ,  $P = 9.1e^{-11}$   $F = 4.05$ ). (D-F) Thickness variation in and surrounding AC2 (anova (D)  $df = 17$ ,  $P = 0.08$   $F = 1.74$  (E)  $df = 29$   $P = 3.9e^{-22}$   $F = 11.88$  (F)  $df = 57$   $P = 2.9e^{-35}$   $F = 16.35$ ). (G-I) Thickness variation in and surrounding AC3 (anova (G)  $df = 17$ ,  $P = 0.59$   $F = 0.89$  (H)  $df = 29$ ,  $P = 2.4e^{-17}$   $F = 9.81$  (I)  $df = 57$ ,  $P = 7.6e^{-33}$   $F = 14.57$ ). Error bars are S.D.

**A**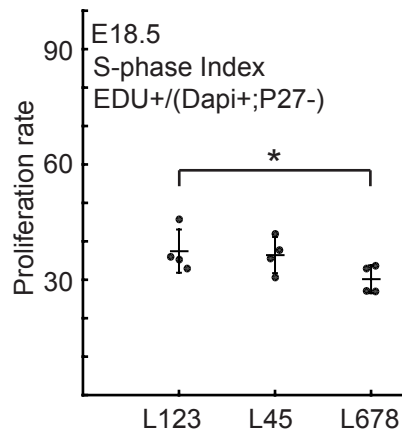**B**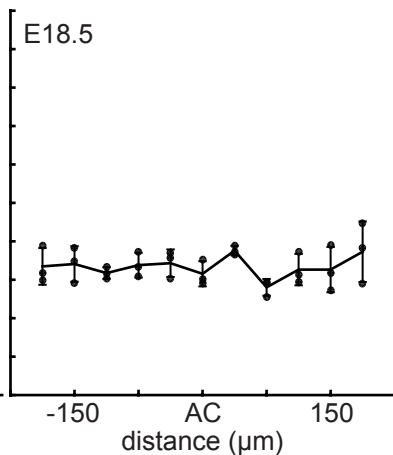**C**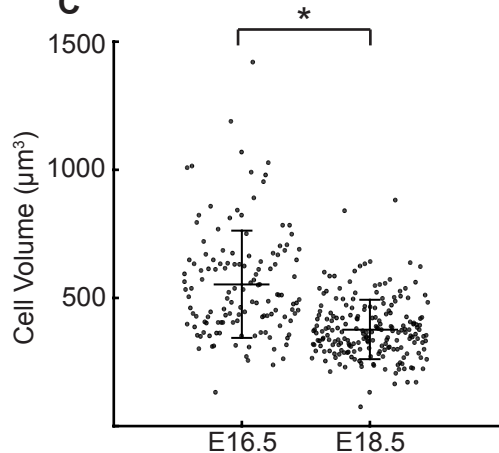

Fig. S4. Proliferation rate is reduced in the central zone of the cerebellum after folding initiation. (A) Proliferation is reduced in lobule region L678 compared to other lobules (anova:  $df = 2$ ;  $P = 0.01$ ,  $F = 9.24$ ). (B) Proliferation through the AC regions is uniform with the surrounding EGL (anova:  $df = 10$ ;  $P = 0.17$ ,  $F = 1.64$ ). (C) At E18.5 cells within the EGL are smaller than at earlier stages (two-tailed t-test  $df = 330$   $P = 2.92e^{-20}$ ,  $T = 9.85$ ). Stars: statistical differences. Error bars: S.D.

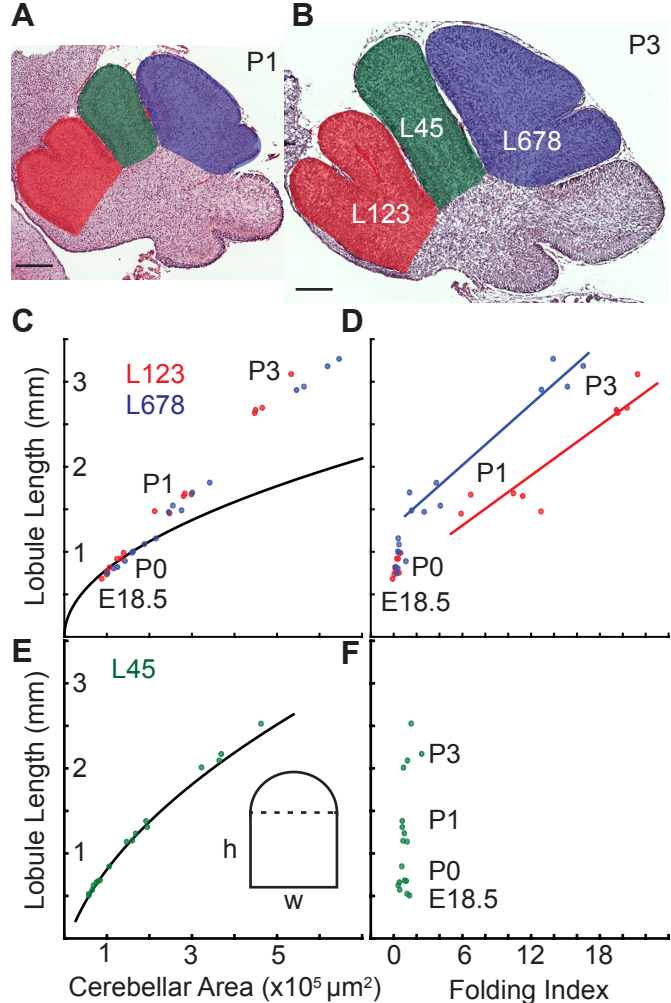

Fig. S5. Differential expansion correlates with progressive subfolding of initial folds. (A,B) H&E stained midline sagittal sections of FVB/N cerebella at P1 and P3 with three lobule regions highlighted in red (L123), green (L45), and blue (L678). (C) Expansion of lobule length and lobule area for L123 and L678 approximate the proportional expansion of a semi-circle (curve) in both regions at E18.5 and P0. After P0 the EGL expansion in both regions increases more than the underlying area creating differential expansion. (D) Folding initiates during regional differential expansion. (E) The expansion in length and area of L45 is proportional to a columnar shape (curve and inset figure) from E18.5 to P3. (F) the L45 region remains unfolded through P3. Scale bars: 200  $\mu\text{m}$ .



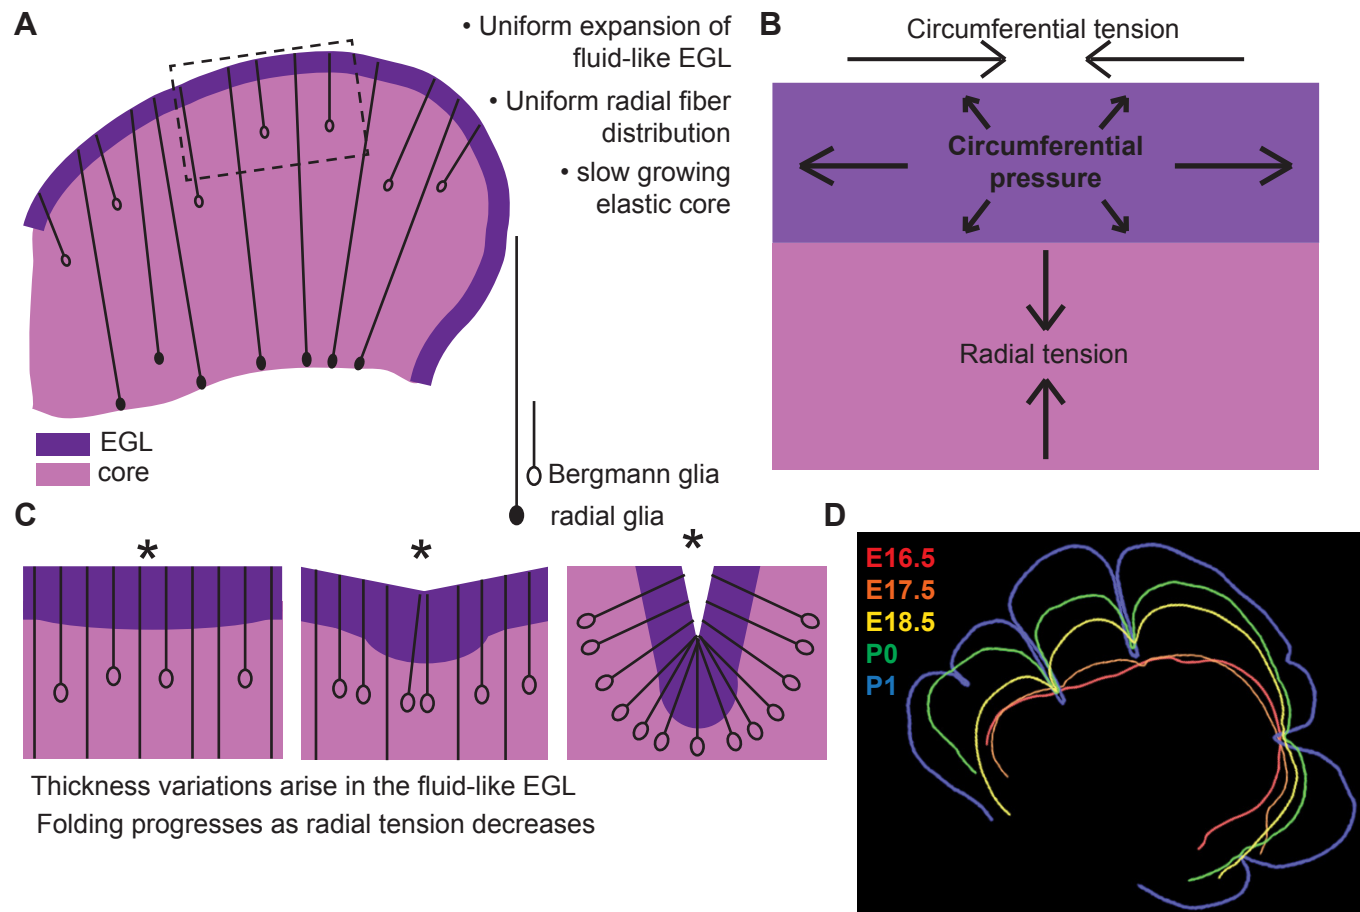

Fig. S6. Uniform cell behaviors within a fluid-like EGL create differential expansion based folding approximated by a multiphase model with radial and circumferential tension. (A) Cartoon of E16.5 cerebellum showing the EGL (dark purple) overlying the incompressible core (light purple) with fibers (lines) of radial glia (closed ovals) and Bergmann glia (open ovals) crossing the cerebellum and the EGL. (B) Map of stress within the cerebellum at the onset of foliation. (C) Schematics showing that an AC is first detected as a regional inward thickening of the EGL (left). The constraining tensions shape the fluid-like EGL such that the EGL becomes thicker at the AC (middle). As radial glia transition to Bergmann glia, modeling predicts a reduction in radial tension (right). (D) Since ACs hold their position in space, and compartmentalize the cells within the EGL, we propose that they behave as mechanical boundaries allowing local domains of differential expansion to arise and progressive folding to occur.
